# Supplementary material for: Increased Expression of YAP Inhibited the Autophagy Level by Upregulating mTOR Signal in the Eutopic ESCs of Endometriosis
Source: Front Endocrinol (Lausanne). 2022 Jan 31;13:813165. doi: 10.3389/fendo.2022.813165 (PMC8842667; doi:10.3389/fendo.2022.813165)
Supplement: Supplementary file 18 [file Table_1.xlsx]

## Sheet: 829
node1	node2	protein1	protein2	neighborhood	neighborhood_transferred	fusion	cooccurence	homology	coexpression	coexpression_transferred	experiments	experiments_transferred	database	database_transferred	textmining	textmining_transferred	combined_score
SEMA3F	YAP1	9606.ENSP00000002829	9606.ENSP00000478927	0	0	0	0	0	207	0	0	0	0	0	0	0	207
USP28	YAP1	9606.ENSP00000003302	9606.ENSP00000478927	0	0	0	0	0	46	82	0	172	0	0	0	101	260
SLC7A2	YAP1	9606.ENSP00000004531	9606.ENSP00000478927	0	0	0	0	0	125	0	0	78	0	0	0	97	207
DVL2	YAP1	9606.ENSP00000005340	9606.ENSP00000478927	0	0	0	0	0	0	0	0	186	0	0	223	127	399
ITGA3	YAP1	9606.ENSP00000007722	9606.ENSP00000478927	0	0	0	0	0	135	0	0	0	0	0	69	49	167
TSPAN9	YAP1	9606.ENSP00000011898	9606.ENSP00000478927	0	0	0	0	0	139	0	0	0	0	0	0	527	575
MAP4K5	YAP1	9606.ENSP00000013125	9606.ENSP00000478927	0	0	0	0	0	0	63	0	0	0	0	91	113	178
GNA11	YAP1	9606.ENSP00000078429	9606.ENSP00000478927	0	0	0	0	0	88	0	0	0	0	0	94	117	206
TRIB2	YAP1	9606.ENSP00000155926	9606.ENSP00000478927	0	0	0	0	0	0	62	0	82	0	0	53	85	154
TNFRSF1A	YAP1	9606.ENSP00000162749	9606.ENSP00000478927	0	0	0	0	0	0	0	0	0	0	0	231	0	230
EPS8L1	YAP1	9606.ENSP00000201647	9606.ENSP00000478927	0	0	0	0	0	0	0	0	182	0	0	0	0	181
REM1	YAP1	9606.ENSP00000201979	9606.ENSP00000478927	0	0	0	0	0	0	0	0	84	0	0	91	130	212
CHRD	YAP1	9606.ENSP00000204604	9606.ENSP00000478927	0	0	0	0	0	0	0	0	133	0	0	0	62	151
AASDH	YAP1	9606.ENSP00000205214	9606.ENSP00000478927	0	0	0	0	0	0	62	0	185	0	0	0	0	202
CDC6	YAP1	9606.ENSP00000209728	9606.ENSP00000478927	0	0	0	0	0	61	0	0	84	0	0	120	67	199
MAPK13	YAP1	9606.ENSP00000211287	9606.ENSP00000478927	0	0	0	0	0	0	0	0	185	0	0	0	57	198
SIRT1	YAP1	9606.ENSP00000212015	9606.ENSP00000478927	0	0	0	0	0	0	61	0	0	0	0	518	0	528
MZF1	YAP1	9606.ENSP00000215057	9606.ENSP00000478927	0	0	0	0	0	0	50	0	68	0	0	121	67	176
CDC34	YAP1	9606.ENSP00000215574	9606.ENSP00000478927	0	0	0	0	0	0	116	0	188	0	0	0	128	319
MAPK1	YAP1	9606.ENSP00000215832	9606.ENSP00000478927	0	0	0	0	0	0	41	0	190	0	0	516	103	617
TCN2	YAP1	9606.ENSP00000215838	9606.ENSP00000478927	0	0	0	0	0	0	0	0	0	0	0	252	0	252
PAPOLA	YAP1	9606.ENSP00000216277	9606.ENSP00000478927	0	0	0	0	0	0	63	140	0	0	0	58	0	174
AURKA	YAP1	9606.ENSP00000216911	9606.ENSP00000478927	0	0	0	0	0	66	62	0	0	0	0	208	49	251
UBOX5	YAP1	9606.ENSP00000217173	9606.ENSP00000478927	0	0	0	0	0	0	136	0	113	0	0	0	94	245
SNTA1	YAP1	9606.ENSP00000217381	9606.ENSP00000478927	0	0	0	0	0	0	0	0	263	0	0	0	0	263
OLFM4	YAP1	9606.ENSP00000219022	9606.ENSP00000478927	0	0	0	0	0	0	0	0	0	0	0	146	58	161
PARD6A	YAP1	9606.ENSP00000219255	9606.ENSP00000478927	0	0	0	0	0	0	0	0	50	0	0	0	227	234
TSC2	YAP1	9606.ENSP00000219476	9606.ENSP00000478927	0	0	0	0	0	0	52	0	0	0	0	164	68	196
STUB1	YAP1	9606.ENSP00000219548	9606.ENSP00000478927	0	0	0	0	0	0	0	111	0	0	0	153	90	254
USP31	YAP1	9606.ENSP00000219689	9606.ENSP00000478927	0	0	0	0	0	0	62	0	0	0	0	248	0	264
CSK	YAP1	9606.ENSP00000220003	9606.ENSP00000478927	0	0	0	0	0	0	0	0	96	0	0	100	66	173
RIPK2	YAP1	9606.ENSP00000220751	9606.ENSP00000478927	0	0	0	0	0	0	0	0	96	0	0	221	0	265
CPQ	YAP1	9606.ENSP00000220763	9606.ENSP00000478927	0	0	0	0	0	0	0	0	141	0	0	0	68	165
DECR1	YAP1	9606.ENSP00000220764	9606.ENSP00000478927	0	0	0	0	0	0	52	0	0	0	0	355	0	362
SFRP1	YAP1	9606.ENSP00000220772	9606.ENSP00000478927	0	0	0	0	0	182	0	0	64	0	0	111	0	259
LIN7B	YAP1	9606.ENSP00000221459	9606.ENSP00000478927	0	0	0	0	0	0	0	0	162	0	0	0	42	162
SGTA	YAP1	9606.ENSP00000221566	9606.ENSP00000478927	0	0	0	0	0	0	0	0	185	0	0	0	50	192
TGFB1	YAP1	9606.ENSP00000221930	9606.ENSP00000478927	0	0	0	0	0	0	0	0	80	900	0	150	0	914
ARRDC2	YAP1	9606.ENSP00000222250	9606.ENSP00000478927	0	0	0	0	0	0	62	0	314	0	0	0	118	382
GSK3A	YAP1	9606.ENSP00000222330	9606.ENSP00000478927	0	0	0	0	0	0	61	0	96	0	0	89	89	201
LAMB1	YAP1	9606.ENSP00000222399	9606.ENSP00000478927	0	0	0	0	0	333	0	0	0	0	0	0	0	333
CAV2	YAP1	9606.ENSP00000222693	9606.ENSP00000478927	0	0	0	0	0	98	0	0	0	0	0	111	50	171
SERPINE1	YAP1	9606.ENSP00000223095	9606.ENSP00000478927	0	0	0	0	0	97	0	0	0	0	0	148	0	197
RPS6KB1	YAP1	9606.ENSP00000225577	9606.ENSP00000478927	0	0	0	0	0	0	63	0	127	0	0	215	57	313
DDX5	YAP1	9606.ENSP00000225792	9606.ENSP00000478927	0	0	0	0	0	0	0	0	135	0	0	99	49	194
NFKB1	YAP1	9606.ENSP00000226574	9606.ENSP00000478927	0	0	0	0	0	0	51	0	84	0	0	94	64	164
CCND1	YAP1	9606.ENSP00000227507	9606.ENSP00000478927	0	0	0	0	0	317	0	0	0	0	0	653	54	756
PDHX	YAP1	9606.ENSP00000227868	9606.ENSP00000478927	0	0	0	0	0	0	0	0	50	0	0	73	204	237
GLI1	YAP1	9606.ENSP00000228682	9606.ENSP00000478927	0	0	0	0	0	0	50	0	185	0	0	291	56	412
CDKN1B	YAP1	9606.ENSP00000228872	9606.ENSP00000478927	0	0	0	0	0	0	0	0	0	0	0	184	0	183
KRR1	YAP1	9606.ENSP00000229214	9606.ENSP00000478927	0	0	0	0	0	0	0	0	123	0	0	243	96	347
CAP2	YAP1	9606.ENSP00000229922	9606.ENSP00000478927	0	0	0	0	0	213	64	0	0	0	0	0	60	247
LOX	YAP1	9606.ENSP00000231004	9606.ENSP00000478927	0	0	0	0	0	161	0	0	0	0	0	183	0	285
SKP1	YAP1	9606.ENSP00000231487	9606.ENSP00000478927	0	0	0	0	0	0	0	0	50	0	0	108	272	329
HES1	YAP1	9606.ENSP00000232424	9606.ENSP00000478927	0	0	0	0	0	123	0	0	77	0	0	87	59	211
WBP1	YAP1	9606.ENSP00000233615	9606.ENSP00000478927	0	0	0	0	0	0	0	379	74	0	0	56	64	423
CTSD	YAP1	9606.ENSP00000236671	9606.ENSP00000478927	0	0	0	0	0	0	61	0	128	0	0	50	43	155
MED28	YAP1	9606.ENSP00000237380	9606.ENSP00000478927	0	0	0	0	0	0	0	250	0	0	0	0	0	250
ABCG2	YAP1	9606.ENSP00000237612	9606.ENSP00000478927	0	0	0	0	0	0	85	0	0	0	0	554	41	575
VPS4B	YAP1	9606.ENSP00000238497	9606.ENSP00000478927	0	0	0	0	0	0	0	787	0	0	0	146	42	810
ATAD2B	YAP1	9606.ENSP00000238789	9606.ENSP00000478927	0	0	0	0	0	0	95	0	133	0	0	0	110	240
PPP1R3C	YAP1	9606.ENSP00000238994	9606.ENSP00000478927	0	0	0	0	0	140	62	0	0	0	0	46	0	163
EGR1	YAP1	9606.ENSP00000239938	9606.ENSP00000478927	0	0	0	0	0	0	50	0	68	0	0	480	0	499
PFN2	YAP1	9606.ENSP00000239940	9606.ENSP00000478927	0	0	0	0	0	155	0	0	0	0	0	0	0	154
NFYB	YAP1	9606.ENSP00000240055	9606.ENSP00000478927	0	0	0	0	0	0	0	0	56	0	0	187	41	199
TBX2	YAP1	9606.ENSP00000240328	9606.ENSP00000478927	0	0	0	0	0	152	0	0	0	0	0	74	96	228
CAT	YAP1	9606.ENSP00000241052	9606.ENSP00000478927	0	0	0	0	0	0	61	0	0	0	0	329	60	356
SNAI1	YAP1	9606.ENSP00000244050	9606.ENSP00000478927	0	0	0	0	0	0	61	0	0	0	0	384	60	408
SOX4	YAP1	9606.ENSP00000244745	9606.ENSP00000478927	0	0	0	0	0	0	0	0	69	0	0	223	0	245
EFNB2	YAP1	9606.ENSP00000245323	9606.ENSP00000478927	0	0	0	0	0	156	0	0	0	0	0	74	0	185
SOX9	YAP1	9606.ENSP00000245479	9606.ENSP00000478927	0	0	0	0	0	213	0	0	69	0	0	714	0	772
UBA2	YAP1	9606.ENSP00000246548	9606.ENSP00000478927	0	0	0	0	0	64	55	775	0	0	0	0	62	788
PRRG2	YAP1	9606.ENSP00000246794	9606.ENSP00000478927	0	0	0	0	0	0	0	379	74	0	0	751	0	844
PIN1	YAP1	9606.ENSP00000247970	9606.ENSP00000478927	0	0	0	0	0	0	0	387	174	0	0	108	136	557
KLF2	YAP1	9606.ENSP00000248071	9606.ENSP00000478927	0	0	0	0	0	0	50	0	157	0	0	80	64	218
HSPB1	YAP1	9606.ENSP00000248553	9606.ENSP00000478927	0	0	0	0	0	70	62	45	80	0	0	83	65	189
YWHAH	YAP1	9606.ENSP00000248975	9606.ENSP00000478927	0	0	0	0	0	0	0	377	169	600	0	0	64	780
RAC2	YAP1	9606.ENSP00000249071	9606.ENSP00000478927	0	0	0	0	0	0	0	0	84	0	0	111	95	198
SMO	YAP1	9606.ENSP00000249373	9606.ENSP00000478927	0	0	0	0	0	111	61	0	64	0	0	0	102	204
PIAS1	YAP1	9606.ENSP00000249636	9606.ENSP00000478927	0	0	0	0	0	0	62	0	133	0	0	0	66	174
DOCK7	YAP1	9606.ENSP00000251157	9606.ENSP00000478927	0	0	0	0	0	0	63	0	0	0	0	73	131	179
RAF1	YAP1	9606.ENSP00000251849	9606.ENSP00000478927	0	0	0	0	0	0	0	0	96	0	0	189	136	311
LAMA5	YAP1	9606.ENSP00000252999	9606.ENSP00000478927	0	0	0	0	0	135	63	0	0	0	0	0	0	154
HIP1R	YAP1	9606.ENSP00000253083	9606.ENSP00000478927	0	0	0	0	0	0	63	0	185	0	0	0	112	262
NR1H2	YAP1	9606.ENSP00000253727	9606.ENSP00000478927	0	0	0	0	0	0	0	0	185	0	0	0	86	223
VPS25	YAP1	9606.ENSP00000253794	9606.ENSP00000478927	0	0	0	0	0	0	0	387	0	0	0	55	134	454
DNAJB1	YAP1	9606.ENSP00000254322	9606.ENSP00000478927	0	0	0	0	0	0	0	0	102	0	0	111	44	170
SMARCC1	YAP1	9606.ENSP00000254480	9606.ENSP00000478927	0	0	0	0	0	0	61	0	157	0	0	111	228	384
JAG1	YAP1	9606.ENSP00000254958	9606.ENSP00000478927	0	0	0	0	0	121	0	0	79	0	0	529	167	640
HSPA12B	YAP1	9606.ENSP00000254963	9606.ENSP00000478927	0	0	0	0	0	0	0	0	157	0	0	0	0	156
CCNA1	YAP1	9606.ENSP00000255465	9606.ENSP00000478927	0	0	0	0	0	0	0	0	154	0	0	385	44	459
KRAS	YAP1	9606.ENSP00000256078	9606.ENSP00000478927	0	0	0	0	0	0	0	0	185	0	0	650	131	731
RRAS2	YAP1	9606.ENSP00000256196	9606.ENSP00000478927	0	0	0	0	0	98	0	0	176	0	0	0	93	267
CCNB1	YAP1	9606.ENSP00000256442	9606.ENSP00000478927	0	0	0	0	0	76	0	0	181	0	0	312	57	443
CDK7	YAP1	9606.ENSP00000256443	9606.ENSP00000478927	0	0	0	0	0	46	50	0	152	0	0	78	50	204
NOTCH2	YAP1	9606.ENSP00000256646	9606.ENSP00000478927	0	0	0	0	0	76	0	0	79	0	0	225	209	408
APC	YAP1	9606.ENSP00000257430	9606.ENSP00000478927	0	0	0	0	0	0	61	0	0	0	0	144	44	164
TBX3	YAP1	9606.ENSP00000257566	9606.ENSP00000478927	0	0	0	0	0	214	0	0	0	0	0	85	96	293
PRRG4	YAP1	9606.ENSP00000257836	9606.ENSP00000478927	0	0	0	0	0	0	0	534	0	0	0	93	0	559
LAMC1	YAP1	9606.ENSP00000258341	9606.ENSP00000478927	0	0	0	0	0	299	63	0	0	0	0	41	0	315
MYO1G	YAP1	9606.ENSP00000258787	9606.ENSP00000478927	0	0	0	0	0	0	61	0	64	0	0	0	127	165
DAB2IP	YAP1	9606.ENSP00000259371	9606.ENSP00000478927	0	0	0	0	0	214	55	0	50	0	0	0	0	232
ADAM10	YAP1	9606.ENSP00000260408	9606.ENSP00000478927	0	0	0	0	0	0	0	0	50	0	0	79	127	169
CCND2	YAP1	9606.ENSP00000261254	9606.ENSP00000478927	0	0	0	0	0	0	0	0	0	0	0	143	361	428
LRP6	YAP1	9606.ENSP00000261349	9606.ENSP00000478927	0	0	0	0	0	140	0	0	54	0	0	86	56	204
LMNB1	YAP1	9606.ENSP00000261366	9606.ENSP00000478927	0	0	0	0	0	0	0	45	0	0	0	167	0	170
SNCAIP	YAP1	9606.ENSP00000261368	9606.ENSP00000478927	0	0	0	0	0	65	51	0	84	0	0	69	58	157
NUAK1	YAP1	9606.ENSP00000261402	9606.ENSP00000478927	0	0	0	0	0	140	0	0	0	0	0	60	56	170
ICE2	YAP1	9606.ENSP00000261520	9606.ENSP00000478927	0	0	0	0	0	0	0	0	0	0	0	81	118	154
USP14	YAP1	9606.ENSP00000261601	9606.ENSP00000478927	0	0	0	0	0	0	0	0	127	0	0	0	108	187
SLC7A5	YAP1	9606.ENSP00000261622	9606.ENSP00000478927	0	0	0	0	0	0	0	0	77	0	0	100	68	158
KPNA3	YAP1	9606.ENSP00000261667	9606.ENSP00000478927	0	0	0	0	0	0	55	0	141	0	0	0	50	161
MPP5	YAP1	9606.ENSP00000261681	9606.ENSP00000478927	0	0	0	0	0	69	0	184	185	0	0	284	91	523
TAOK1	YAP1	9606.ENSP00000261716	9606.ENSP00000478927	0	0	0	0	0	0	55	0	261	0	0	294	313	615
PDGFRB	YAP1	9606.ENSP00000261799	9606.ENSP00000478927	0	0	0	0	0	77	0	0	90	0	0	187	67	277
RAB11A	YAP1	9606.ENSP00000261890	9606.ENSP00000478927	0	0	0	0	0	0	0	379	84	0	0	49	0	411
CCNT1	YAP1	9606.ENSP00000261900	9606.ENSP00000478927	0	0	0	0	0	0	0	0	182	0	0	0	0	181
FAF2	YAP1	9606.ENSP00000261942	9606.ENSP00000478927	0	0	0	0	0	0	62	0	158	0	0	0	57	190
TWSG1	YAP1	9606.ENSP00000262120	9606.ENSP00000478927	0	0	0	0	0	66	0	0	0	0	0	126	87	189
RHEB	YAP1	9606.ENSP00000262187	9606.ENSP00000478927	0	0	0	0	0	0	0	0	84	0	0	82	233	298
NUBP2	YAP1	9606.ENSP00000262302	9606.ENSP00000478927	0	0	0	0	0	0	0	387	0	0	0	108	0	429
AXIN1	YAP1	9606.ENSP00000262320	9606.ENSP00000478927	0	0	0	0	0	0	0	348	167	0	0	291	98	606
SMURF2	YAP1	9606.ENSP00000262435	9606.ENSP00000478927	0	0	0	0	566	0	0	0	190	0	0	218	132	282
SETD1A	YAP1	9606.ENSP00000262519	9606.ENSP00000478927	0	0	0	0	0	0	49	0	177	0	0	82	125	287
ZC3H3	YAP1	9606.ENSP00000262577	9606.ENSP00000478927	0	0	0	0	0	0	71	0	178	0	0	0	43	205
PRDX1	YAP1	9606.ENSP00000262746	9606.ENSP00000478927	0	0	0	0	0	63	0	387	82	0	0	220	0	533
HACE1	YAP1	9606.ENSP00000262903	9606.ENSP00000478927	0	0	0	0	0	0	86	0	80	0	0	0	107	183
E2F3	YAP1	9606.ENSP00000262904	9606.ENSP00000478927	0	0	0	0	0	0	61	0	0	0	0	171	109	245
PIAS4	YAP1	9606.ENSP00000262971	9606.ENSP00000478927	0	0	0	0	0	0	62	0	133	0	0	41	66	174
MAPK3	YAP1	9606.ENSP00000263025	9606.ENSP00000478927	0	0	0	0	0	0	41	0	190	0	0	247	103	405
CCDC6	YAP1	9606.ENSP00000263102	9606.ENSP00000478927	0	0	0	0	0	0	61	0	0	0	0	82	158	210
SMARCB1	YAP1	9606.ENSP00000263121	9606.ENSP00000478927	0	0	0	0	0	0	55	0	126	0	0	217	75	321
MED15	YAP1	9606.ENSP00000263205	9606.ENSP00000478927	0	0	0	0	0	0	0	0	167	0	0	70	0	192
PPM1F	YAP1	9606.ENSP00000263212	9606.ENSP00000478927	0	0	0	0	0	0	62	0	133	0	0	55	0	164
ITPKC	YAP1	9606.ENSP00000263370	9606.ENSP00000478927	0	0	0	0	0	0	0	0	0	0	0	0	173	173
NOTCH3	YAP1	9606.ENSP00000263388	9606.ENSP00000478927	0	0	0	0	0	152	61	0	79	0	0	199	209	450
ARID3A	YAP1	9606.ENSP00000263620	9606.ENSP00000478927	0	0	0	0	0	0	63	0	0	0	0	73	106	155
ACVR1	YAP1	9606.ENSP00000263640	9606.ENSP00000478927	0	0	0	0	0	0	0	0	164	0	0	59	65	200
EPCAM	YAP1	9606.ENSP00000263735	9606.ENSP00000478927	0	0	0	0	0	88	0	0	0	0	0	201	0	240
AKT3	YAP1	9606.ENSP00000263826	9606.ENSP00000478927	0	0	0	0	0	0	62	0	96	0	0	111	137	262
MAP4K3	YAP1	9606.ENSP00000263881	9606.ENSP00000478927	0	0	0	0	0	69	63	0	0	0	0	53	113	169
KDR	YAP1	9606.ENSP00000263923	9606.ENSP00000478927	0	0	0	0	0	89	0	0	90	0	0	161	55	254
LNX1	YAP1	9606.ENSP00000263925	9606.ENSP00000478927	0	0	0	0	0	0	59	0	154	0	0	247	155	425
CDH3	YAP1	9606.ENSP00000264012	9606.ENSP00000478927	0	0	0	0	0	70	0	320	54	0	0	89	50	387
GPC1	YAP1	9606.ENSP00000264039	9606.ENSP00000478927	0	0	0	0	0	170	0	0	0	0	0	55	0	182
CUL3	YAP1	9606.ENSP00000264414	9606.ENSP00000478927	0	0	0	0	0	0	63	0	100	0	0	111	85	222
UBE2S	YAP1	9606.ENSP00000264552	9606.ENSP00000478927	0	0	0	0	0	0	60	0	188	0	0	254	57	391
WNT5A	YAP1	9606.ENSP00000264634	9606.ENSP00000478927	0	0	0	0	0	148	0	0	0	0	0	205	130	359
STC2	YAP1	9606.ENSP00000265087	9606.ENSP00000478927	0	0	0	0	0	181	0	0	0	0	0	0	66	202
ARRDC3	YAP1	9606.ENSP00000265138	9606.ENSP00000478927	0	0	0	0	0	0	62	0	314	0	0	69	118	400
ABCB6	YAP1	9606.ENSP00000265316	9606.ENSP00000478927	0	0	0	0	0	0	62	0	55	0	0	137	225	327
SRF	YAP1	9606.ENSP00000265354	9606.ENSP00000478927	0	0	0	0	0	0	0	0	58	0	0	293	50	312
PTPN23	YAP1	9606.ENSP00000265562	9606.ENSP00000478927	0	0	0	0	0	0	62	0	265	0	0	57	352	522
CDK6	YAP1	9606.ENSP00000265734	9606.ENSP00000478927	0	0	0	0	0	0	61	0	85	0	0	238	56	299
ANLN	YAP1	9606.ENSP00000265748	9606.ENSP00000478927	0	0	0	0	0	132	0	0	0	0	0	355	0	416
SMARCA2	YAP1	9606.ENSP00000265773	9606.ENSP00000478927	0	0	0	0	0	0	64	0	185	0	0	138	62	300
SH2D4A	YAP1	9606.ENSP00000265807	9606.ENSP00000478927	0	0	0	0	0	140	0	0	0	0	0	0	56	153
PIK3C2A	YAP1	9606.ENSP00000265970	9606.ENSP00000478927	0	0	0	0	0	63	89	0	89	0	0	0	0	154
ETNK1	YAP1	9606.ENSP00000266517	9606.ENSP00000478927	0	0	0	0	0	0	0	0	0	0	0	244	50	251
LGR5	YAP1	9606.ENSP00000266674	9606.ENSP00000478927	0	0	0	0	0	72	0	0	0	0	0	269	41	292
LUM	YAP1	9606.ENSP00000266718	9606.ENSP00000478927	0	0	0	0	0	152	0	0	0	0	0	48	0	158
ASCL1	YAP1	9606.ENSP00000266744	9606.ENSP00000478927	0	0	0	0	0	0	0	0	0	0	0	186	99	235
RB1	YAP1	9606.ENSP00000267163	9606.ENSP00000478927	0	0	0	0	0	0	55	0	0	900	0	108	47	908
SORD	YAP1	9606.ENSP00000267814	9606.ENSP00000478927	0	0	0	0	0	0	0	0	0	0	0	80	115	150
ARRDC4	YAP1	9606.ENSP00000268042	9606.ENSP00000478927	0	0	0	0	0	0	62	0	314	0	0	0	118	382
PML	YAP1	9606.ENSP00000268058	9606.ENSP00000478927	0	0	0	0	0	0	51	379	50	900	0	83	90	942
IQGAP1	YAP1	9606.ENSP00000268182	9606.ENSP00000478927	0	0	0	0	0	61	49	320	0	0	0	116	58	402
EPN3	YAP1	9606.ENSP00000268933	9606.ENSP00000478927	0	0	0	0	0	69	64	0	89	0	0	0	67	160
CDH2	YAP1	9606.ENSP00000269141	9606.ENSP00000478927	0	0	0	0	0	95	0	0	54	0	0	269	0	319
GATA6	YAP1	9606.ENSP00000269216	9606.ENSP00000478927	0	0	0	0	0	139	49	0	78	0	0	145	0	268
TP53	YAP1	9606.ENSP00000269305	9606.ENSP00000478927	0	0	0	0	0	0	55	0	76	0	0	494	50	524
IGFBP4	YAP1	9606.ENSP00000269593	9606.ENSP00000478927	0	0	0	0	0	138	0	0	0	0	0	73	0	166
SOD1	YAP1	9606.ENSP00000270142	9606.ENSP00000478927	0	0	0	0	0	0	0	0	0	0	0	243	0	242
SIK1	YAP1	9606.ENSP00000270162	9606.ENSP00000478927	0	0	0	0	0	0	0	0	72	0	0	0	173	199
DMWD	YAP1	9606.ENSP00000270223	9606.ENSP00000478927	0	0	0	0	0	0	62	0	77	0	0	46	105	161
SLC44A3	YAP1	9606.ENSP00000271227	9606.ENSP00000478927	0	0	0	0	0	140	62	0	64	0	0	0	0	179
HMCN1	YAP1	9606.ENSP00000271588	9606.ENSP00000478927	0	0	0	0	0	142	61	0	0	0	0	0	0	159
WNT9A	YAP1	9606.ENSP00000272164	9606.ENSP00000478927	0	0	0	0	0	76	0	0	0	0	0	108	226	306
MEIS1	YAP1	9606.ENSP00000272369	9606.ENSP00000478927	0	0	0	0	0	0	0	0	185	0	0	92	400	517
CSRNP1	YAP1	9606.ENSP00000273153	9606.ENSP00000478927	0	0	0	0	0	0	0	0	0	0	0	58	211	224
CCNA2	YAP1	9606.ENSP00000274026	9606.ENSP00000478927	0	0	0	0	0	61	0	0	154	0	0	255	44	358
SETD7	YAP1	9606.ENSP00000274031	9606.ENSP00000478927	0	0	0	0	0	63	0	0	107	0	0	112	0	192
PLK2	YAP1	9606.ENSP00000274289	9606.ENSP00000478927	0	0	0	0	0	98	0	0	56	0	0	99	91	209
MUT	YAP1	9606.ENSP00000274813	9606.ENSP00000478927	0	0	0	0	0	0	0	0	0	0	0	88	204	243
TMEM47	YAP1	9606.ENSP00000275954	9606.ENSP00000478927	0	0	0	0	0	185	0	0	0	0	0	0	0	185
CDK16	YAP1	9606.ENSP00000276052	9606.ENSP00000478927	0	0	0	0	0	59	51	0	85	0	0	0	94	160
ATP6V1B2	YAP1	9606.ENSP00000276390	9606.ENSP00000478927	0	0	0	0	0	0	61	0	152	0	0	0	0	169
TATDN1	YAP1	9606.ENSP00000276692	9606.ENSP00000478927	0	0	0	0	0	0	0	0	175	0	0	0	0	175
LIN7C	YAP1	9606.ENSP00000278193	9606.ENSP00000478927	0	0	0	0	0	0	0	166	186	0	0	142	42	367
ATM	YAP1	9606.ENSP00000278616	9606.ENSP00000478927	0	0	0	0	0	0	61	0	0	0	0	555	50	568
PDCD4	YAP1	9606.ENSP00000280154	9606.ENSP00000478927	0	0	0	0	0	0	58	0	0	0	0	138	67	176
CRIM1	YAP1	9606.ENSP00000280527	9606.ENSP00000478927	0	0	0	0	0	125	0	0	0	0	0	165	86	273
EPS8	YAP1	9606.ENSP00000281172	9606.ENSP00000478927	0	0	0	0	0	98	0	0	182	0	0	46	0	234
ASAP2	YAP1	9606.ENSP00000281419	9606.ENSP00000478927	0	0	0	0	0	142	50	0	0	0	0	0	0	150
TJP1	YAP1	9606.ENSP00000281537	9606.ENSP00000478927	0	0	0	0	0	389	61	0	84	0	0	287	50	579
FBXW7	YAP1	9606.ENSP00000281708	9606.ENSP00000478927	0	0	0	0	0	0	61	379	0	0	0	213	0	501
TCF7L1	YAP1	9606.ENSP00000282111	9606.ENSP00000478927	0	0	0	0	0	69	0	0	0	800	0	65	44	811
GJA1	YAP1	9606.ENSP00000282561	9606.ENSP00000478927	0	0	0	0	0	276	0	0	265	0	0	55	0	453
PLOD2	YAP1	9606.ENSP00000282903	9606.ENSP00000478927	0	0	0	0	0	181	0	45	0	0	0	63	0	203
HNRNPU	YAP1	9606.ENSP00000283179	9606.ENSP00000478927	0	0	0	0	0	47	50	379	0	0	0	48	0	393
RANBP2	YAP1	9606.ENSP00000283195	9606.ENSP00000478927	0	0	0	0	0	46	55	0	170	0	0	47	50	199
DDAH1	YAP1	9606.ENSP00000284031	9606.ENSP00000478927	0	0	0	0	0	195	0	0	0	0	0	0	0	195
GRAP	YAP1	9606.ENSP00000284154	9606.ENSP00000478927	0	0	0	0	0	0	0	0	125	0	0	0	98	177
HSPA13	YAP1	9606.ENSP00000285667	9606.ENSP00000478927	0	0	0	0	0	0	0	0	157	0	0	0	0	156
RHOC	YAP1	9606.ENSP00000285735	9606.ENSP00000478927	0	0	0	0	0	77	0	0	84	0	0	167	129	304
UBE2L6	YAP1	9606.ENSP00000287156	9606.ENSP00000478927	0	0	0	0	0	0	60	0	188	0	0	0	68	226
ATAD2	YAP1	9606.ENSP00000287394	9606.ENSP00000478927	0	0	0	0	0	0	95	0	85	0	0	56	52	159
PPARG	YAP1	9606.ENSP00000287820	9606.ENSP00000478927	0	0	0	0	0	0	0	0	57	0	0	145	64	179
FZD1	YAP1	9606.ENSP00000287934	9606.ENSP00000478927	0	0	0	0	0	69	0	0	64	0	0	111	68	181
KIT	YAP1	9606.ENSP00000288135	9606.ENSP00000478927	0	0	0	0	0	0	0	0	90	0	0	207	0	247
FMNL2	YAP1	9606.ENSP00000288670	9606.ENSP00000478927	0	0	0	0	0	91	0	0	99	0	0	0	50	153
SMAD6	YAP1	9606.ENSP00000288840	9606.ENSP00000478927	0	0	0	0	0	111	0	379	789	0	0	122	57	885
PIK3CB	YAP1	9606.ENSP00000289153	9606.ENSP00000478927	0	0	0	0	0	0	89	0	89	0	0	87	183	298
KPNB1	YAP1	9606.ENSP00000290158	9606.ENSP00000478927	0	0	0	0	0	0	64	0	186	0	0	49	0	212
ARAF	YAP1	9606.ENSP00000290277	9606.ENSP00000478927	0	0	0	0	0	0	0	0	96	0	0	150	179	314
MCAT	YAP1	9606.ENSP00000290429	9606.ENSP00000478927	0	0	0	0	0	0	61	0	50	0	0	398	159	487
PSMB4	YAP1	9606.ENSP00000290541	9606.ENSP00000478927	0	0	0	0	0	0	0	45	262	0	0	0	49	271
BTG2	YAP1	9606.ENSP00000290551	9606.ENSP00000478927	0	0	0	0	0	0	56	0	0	0	0	80	128	176
RSPH1	YAP1	9606.ENSP00000291536	9606.ENSP00000478927	0	0	0	0	0	0	0	0	0	0	0	266	0	266
FGFR4	YAP1	9606.ENSP00000292408	9606.ENSP00000478927	0	0	0	0	0	65	0	0	90	0	0	88	0	156
NACC1	YAP1	9606.ENSP00000292431	9606.ENSP00000478927	0	0	0	0	0	62	50	0	68	0	0	70	90	169
CPSF4	YAP1	9606.ENSP00000292476	9606.ENSP00000478927	0	0	0	0	0	0	0	0	178	0	0	0	43	179
PKDCC	YAP1	9606.ENSP00000294964	9606.ENSP00000478927	0	0	0	0	0	152	0	0	96	0	0	0	0	200
REL	YAP1	9606.ENSP00000295025	9606.ENSP00000478927	0	0	0	0	0	0	0	0	0	0	0	138	68	162
MITF	YAP1	9606.ENSP00000295600	9606.ENSP00000478927	0	0	0	0	0	0	0	0	0	0	0	106	182	237
PRKCI	YAP1	9606.ENSP00000295797	9606.ENSP00000478927	0	0	0	0	0	70	63	0	129	0	0	172	311	488
PRICKLE2	YAP1	9606.ENSP00000295902	9606.ENSP00000478927	0	0	0	0	0	103	62	0	64	0	0	0	221	304
SLMAP	YAP1	9606.ENSP00000295951	9606.ENSP00000478927	0	0	0	0	0	0	63	0	85	0	0	70	127	210
IL17RD	YAP1	9606.ENSP00000296318	9606.ENSP00000478927	0	0	0	0	0	88	0	0	0	0	0	0	178	218
UBXN7	YAP1	9606.ENSP00000296328	9606.ENSP00000478927	0	0	0	0	0	0	81	819	124	0	0	0	178	864
ANXA5	YAP1	9606.ENSP00000296511	9606.ENSP00000478927	0	0	0	0	0	76	0	45	0	0	0	213	0	244
ITGA2	YAP1	9606.ENSP00000296585	9606.ENSP00000478927	0	0	0	0	0	123	0	0	0	0	0	83	49	168
TCERG1	YAP1	9606.ENSP00000296702	9606.ENSP00000478927	0	0	0	0	0	64	62	0	185	0	0	0	44	224
RICTOR	YAP1	9606.ENSP00000296782	9606.ENSP00000478927	0	0	0	0	0	0	64	0	82	0	0	90	62	168
UBLCP1	YAP1	9606.ENSP00000296786	9606.ENSP00000478927	0	0	0	0	0	0	61	0	185	0	0	56	131	288
FOXQ1	YAP1	9606.ENSP00000296839	9606.ENSP00000478927	0	0	0	0	0	98	0	0	0	0	0	110	0	162
NPM1	YAP1	9606.ENSP00000296930	9606.ENSP00000478927	0	0	0	0	0	63	0	45	0	0	0	41	158	180
SOX17	YAP1	9606.ENSP00000297316	9606.ENSP00000478927	0	0	0	0	0	59	0	0	69	0	0	189	0	227
ALDH1A1	YAP1	9606.ENSP00000297785	9606.ENSP00000478927	0	0	0	0	0	0	0	0	0	0	0	167	0	167
COL14A1	YAP1	9606.ENSP00000297848	9606.ENSP00000478927	0	0	0	0	0	110	0	0	0	0	0	0	98	162
STK32C	YAP1	9606.ENSP00000298630	9606.ENSP00000478927	0	0	0	0	0	0	63	0	127	0	0	108	49	213
ADAMTS15	YAP1	9606.ENSP00000299164	9606.ENSP00000478927	0	0	0	0	0	213	0	0	0	0	0	0	0	213
CYYR1	YAP1	9606.ENSP00000299340	9606.ENSP00000478927	0	0	0	0	0	0	0	297	0	0	0	0	63	313
DCHS1	YAP1	9606.ENSP00000299441	9606.ENSP00000478927	0	0	0	0	0	0	0	0	54	0	0	172	441	523
RBPMS2	YAP1	9606.ENSP00000300069	9606.ENSP00000478927	0	0	0	0	0	76	55	0	0	0	0	151	359	461
PLK1	YAP1	9606.ENSP00000300093	9606.ENSP00000478927	0	0	0	0	0	0	0	0	56	0	0	207	50	226
RUNX1	YAP1	9606.ENSP00000300305	9606.ENSP00000478927	0	0	0	0	0	0	0	379	185	900	0	0	116	949
MED1	YAP1	9606.ENSP00000300651	9606.ENSP00000478927	0	0	0	0	0	46	61	0	167	0	0	42	43	191
RRM1	YAP1	9606.ENSP00000300738	9606.ENSP00000478927	0	0	0	0	0	0	50	0	261	0	0	56	0	279
CDC42EP5	YAP1	9606.ENSP00000301200	9606.ENSP00000478927	0	0	0	0	0	98	0	0	0	0	0	86	132	221
SPRYD3	YAP1	9606.ENSP00000301463	9606.ENSP00000478927	0	0	0	0	0	0	129	0	86	0	0	0	97	218
E4F1	YAP1	9606.ENSP00000301727	9606.ENSP00000478927	0	0	0	0	0	0	50	0	68	0	0	351	0	375
MGMT	YAP1	9606.ENSP00000302111	9606.ENSP00000478927	0	0	0	0	0	0	0	0	141	0	0	73	56	182
BCL2L1	YAP1	9606.ENSP00000302564	9606.ENSP00000478927	0	0	0	0	0	0	0	336	56	0	0	269	0	501
SH3D19	YAP1	9606.ENSP00000302913	9606.ENSP00000478927	0	0	0	0	0	278	0	0	0	0	0	0	0	278
PPIC	YAP1	9606.ENSP00000303057	9606.ENSP00000478927	0	0	0	0	0	255	0	0	84	0	0	0	0	288
UBE2E1	YAP1	9606.ENSP00000303709	9606.ENSP00000478927	0	0	0	0	0	0	60	0	312	0	0	0	69	345
RNF139	YAP1	9606.ENSP00000304051	9606.ENSP00000478927	0	0	0	0	0	0	0	0	131	0	0	0	73	159
RAC3	YAP1	9606.ENSP00000304283	9606.ENSP00000478927	0	0	0	0	0	60	0	0	84	0	0	85	95	191
ANKRD27	YAP1	9606.ENSP00000304292	9606.ENSP00000478927	0	0	0	0	0	0	107	0	158	0	0	0	58	229
SNX7	YAP1	9606.ENSP00000304429	9606.ENSP00000478927	0	0	0	0	0	213	62	0	0	0	0	0	0	230
FASN	YAP1	9606.ENSP00000304592	9606.ENSP00000478927	0	0	0	0	0	69	59	192	0	0	0	112	0	287
CTNNA1	YAP1	9606.ENSP00000304669	9606.ENSP00000478927	0	0	0	0	0	98	62	320	0	0	0	172	65	473
IRS1	YAP1	9606.ENSP00000304895	9606.ENSP00000478927	0	0	0	0	0	137	0	0	64	0	0	145	0	249
SDPR	YAP1	9606.ENSP00000305675	9606.ENSP00000478927	0	0	0	0	0	0	0	0	0	0	0	144	91	188
SIK2	YAP1	9606.ENSP00000305976	9606.ENSP00000478927	0	0	0	0	0	0	0	0	72	0	0	138	173	280
RPAP1	YAP1	9606.ENSP00000306123	9606.ENSP00000478927	0	0	0	0	0	88	131	0	0	0	0	0	0	173
FOS	YAP1	9606.ENSP00000306245	9606.ENSP00000478927	0	0	0	0	0	0	0	0	0	0	0	250	0	250
YWHAG	YAP1	9606.ENSP00000306330	9606.ENSP00000478927	0	0	0	0	0	0	0	344	169	600	0	61	59	772
CAMTA1	YAP1	9606.ENSP00000306522	9606.ENSP00000478927	0	0	0	0	0	0	62	0	0	0	0	520	0	530
BOLA2B	YAP1	9606.ENSP00000306752	9606.ENSP00000478927	0	0	0	0	0	0	112	0	182	0	0	0	51	250
VASN	YAP1	9606.ENSP00000306864	9606.ENSP00000478927	0	0	0	0	0	139	0	0	0	0	0	55	0	151
GABARAP	YAP1	9606.ENSP00000306866	9606.ENSP00000478927	0	0	0	0	0	0	62	0	169	0	0	0	43	188
SEC23A	YAP1	9606.ENSP00000306881	9606.ENSP00000478927	0	0	0	0	0	65	63	0	172	0	0	150	95	340
BPTF	YAP1	9606.ENSP00000307208	9606.ENSP00000478927	0	0	0	0	0	0	87	0	84	0	0	0	283	347
EIF2AK3	YAP1	9606.ENSP00000307235	9606.ENSP00000478927	0	0	0	0	0	0	64	0	0	0	0	133	0	153
RPTOR	YAP1	9606.ENSP00000307272	9606.ENSP00000478927	0	0	0	0	0	49	77	0	0	0	0	111	55	163
SCAMP3	YAP1	9606.ENSP00000307275	9606.ENSP00000478927	0	0	0	0	0	0	63	313	0	0	0	0	0	328
FEM1B	YAP1	9606.ENSP00000307298	9606.ENSP00000478927	0	0	0	0	0	0	51	0	80	0	0	0	203	243
TADA3	YAP1	9606.ENSP00000307684	9606.ENSP00000478927	0	0	0	0	0	0	79	0	138	0	0	43	62	191
ZNF239	YAP1	9606.ENSP00000307774	9606.ENSP00000478927	0	0	0	0	0	61	50	0	68	0	0	104	129	232
RPS6KB2	YAP1	9606.ENSP00000308413	9606.ENSP00000478927	0	0	0	0	0	0	63	0	127	0	0	0	57	161
RHOD	YAP1	9606.ENSP00000308576	9606.ENSP00000478927	0	0	0	0	0	156	0	0	84	0	0	110	0	251
HLTF	YAP1	9606.ENSP00000308944	9606.ENSP00000478927	0	0	0	0	0	0	120	0	82	0	0	0	44	160
USP48	YAP1	9606.ENSP00000309262	9606.ENSP00000478927	0	0	0	0	0	0	82	0	172	0	0	0	101	256
PSMD1	YAP1	9606.ENSP00000309474	9606.ENSP00000478927	0	0	0	0	0	0	64	0	138	0	0	0	57	172
ZNF408	YAP1	9606.ENSP00000309606	9606.ENSP00000478927	0	0	0	0	0	0	50	0	68	0	0	94	98	179
TAOK2	YAP1	9606.ENSP00000310094	9606.ENSP00000478927	0	0	0	0	0	0	55	0	126	0	0	292	58	375
PSMC5	YAP1	9606.ENSP00000310572	9606.ENSP00000478927	0	0	0	0	0	0	0	45	85	0	0	46	103	152
CSRP2	YAP1	9606.ENSP00000310901	9606.ENSP00000478927	0	0	0	0	0	69	0	0	64	0	0	0	150	194
MAPK7	YAP1	9606.ENSP00000311005	9606.ENSP00000478927	0	0	0	0	0	0	0	0	185	0	0	0	57	198
CASP3	YAP1	9606.ENSP00000311032	9606.ENSP00000478927	0	0	0	0	0	0	0	0	80	0	0	294	0	322
DHX37	YAP1	9606.ENSP00000311135	9606.ENSP00000478927	0	0	0	0	0	0	62	0	147	0	0	0	0	165
PPP2R1B	YAP1	9606.ENSP00000311344	9606.ENSP00000478927	0	0	0	0	0	0	64	0	0	600	0	85	49	630
SNX33	YAP1	9606.ENSP00000311427	9606.ENSP00000478927	0	0	0	0	0	111	63	0	84	0	0	0	0	170
OXSR1	YAP1	9606.ENSP00000311713	9606.ENSP00000478927	0	0	0	0	0	104	64	0	0	0	0	0	154	228
CFLAR	YAP1	9606.ENSP00000312455	9606.ENSP00000478927	0	0	0	0	0	0	0	0	80	0	0	81	79	153
SPHK1	YAP1	9606.ENSP00000313681	9606.ENSP00000478927	0	0	0	0	0	0	0	0	0	0	0	103	98	156
SSNA1	YAP1	9606.ENSP00000313752	9606.ENSP00000478927	0	0	0	0	0	0	50	0	0	0	0	64	128	156
BOK	YAP1	9606.ENSP00000314132	9606.ENSP00000478927	0	0	0	0	0	139	0	0	56	0	0	0	0	152
GAK	YAP1	9606.ENSP00000314499	9606.ENSP00000478927	0	0	0	0	0	0	64	0	111	0	0	0	74	162
UACA	YAP1	9606.ENSP00000314556	9606.ENSP00000478927	0	0	0	0	0	183	51	0	80	0	0	74	68	272
EDNRA	YAP1	9606.ENSP00000315011	9606.ENSP00000478927	0	0	0	0	0	177	51	0	58	0	0	49	0	206
DVL3	YAP1	9606.ENSP00000316054	9606.ENSP00000478927	0	0	0	0	0	0	0	0	186	0	0	58	127	272
LIMCH1	YAP1	9606.ENSP00000316891	9606.ENSP00000478927	0	0	0	0	0	129	62	0	64	0	0	0	0	168
HSPH1	YAP1	9606.ENSP00000318687	9606.ENSP00000478927	0	0	0	0	0	0	0	163	157	0	0	0	0	264
FMN2	YAP1	9606.ENSP00000318884	9606.ENSP00000478927	0	0	0	0	0	0	64	0	132	0	0	0	50	160
TENC1	YAP1	9606.ENSP00000319756	9606.ENSP00000478927	0	0	0	0	0	0	54	0	111	0	0	104	0	180
EZH2	YAP1	9606.ENSP00000320147	9606.ENSP00000478927	0	0	0	0	0	0	0	0	107	0	0	287	0	336
PKM	YAP1	9606.ENSP00000320171	9606.ENSP00000478927	0	0	0	0	0	0	0	0	185	0	0	79	0	217
KIF1C	YAP1	9606.ENSP00000320821	9606.ENSP00000478927	0	0	0	0	0	88	62	0	54	0	0	0	75	151
CNOT1	YAP1	9606.ENSP00000320949	9606.ENSP00000478927	0	0	0	0	0	58	111	0	0	0	0	122	0	200
DCBLD2	YAP1	9606.ENSP00000321573	9606.ENSP00000478927	0	0	0	0	0	159	0	0	0	0	0	0	0	158
CDC25C	YAP1	9606.ENSP00000321656	9606.ENSP00000478927	0	0	0	0	0	0	0	0	144	0	0	64	67	187
ETV4	YAP1	9606.ENSP00000321835	9606.ENSP00000478927	0	0	0	0	0	99	0	0	0	0	0	85	167	253
E2F7	YAP1	9606.ENSP00000323246	9606.ENSP00000478927	0	0	0	0	0	76	50	0	0	0	0	171	45	212
UBE2O	YAP1	9606.ENSP00000323687	9606.ENSP00000478927	0	0	0	0	0	0	60	0	188	0	0	0	92	246
PLEC	YAP1	9606.ENSP00000323856	9606.ENSP00000478927	0	0	0	0	0	0	0	0	64	0	0	94	96	166
FZD2	YAP1	9606.ENSP00000323901	9606.ENSP00000478927	0	0	0	0	0	76	0	0	64	0	0	69	107	184
SMARCE1	YAP1	9606.ENSP00000323967	9606.ENSP00000478927	0	0	0	0	0	0	0	0	167	0	0	0	41	167
HSPA5	YAP1	9606.ENSP00000324173	9606.ENSP00000478927	0	0	0	0	0	0	0	0	157	0	0	86	0	196
ZYX	YAP1	9606.ENSP00000324422	9606.ENSP00000478927	0	0	0	0	0	0	0	45	92	0	0	222	62	282
CSNK1D	YAP1	9606.ENSP00000324464	9606.ENSP00000478927	0	0	0	0	0	0	50	0	0	800	0	0	181	830
SEPT1	YAP1	9606.ENSP00000324511	9606.ENSP00000478927	0	0	0	0	0	0	0	0	152	0	0	0	0	151
SAV1	YAP1	9606.ENSP00000324729	9606.ENSP00000478927	0	0	0	0	0	0	0	0	87	900	0	733	126	975
PPP2R1A	YAP1	9606.ENSP00000324804	9606.ENSP00000478927	0	0	0	0	0	0	64	45	0	600	0	0	49	614
GSK3B	YAP1	9606.ENSP00000324806	9606.ENSP00000478927	0	0	0	0	0	0	61	348	96	0	0	64	89	442
STK11	YAP1	9606.ENSP00000324856	9606.ENSP00000478927	0	0	0	0	0	0	62	0	82	0	0	244	65	309
PPP2R2A	YAP1	9606.ENSP00000325074	9606.ENSP00000478927	0	0	0	0	0	0	62	0	0	600	0	81	62	633
PGR	YAP1	9606.ENSP00000325120	9606.ENSP00000478927	0	0	0	0	0	0	0	0	57	0	0	187	0	200
FBN1	YAP1	9606.ENSP00000325527	9606.ENSP00000478927	0	0	0	0	0	110	0	0	79	0	0	67	105	223
STK25	YAP1	9606.ENSP00000325748	9606.ENSP00000478927	0	0	0	0	0	0	63	0	0	0	0	79	173	223
PPP1CA	YAP1	9606.ENSP00000326031	9606.ENSP00000478927	0	0	0	0	0	0	61	377	76	800	0	620	0	951
PMAIP1	YAP1	9606.ENSP00000326119	9606.ENSP00000478927	0	0	0	0	0	0	0	0	0	0	0	171	0	171
HCCS	YAP1	9606.ENSP00000326579	9606.ENSP00000478927	0	0	0	0	0	0	61	0	0	0	0	79	173	222
TNFRSF12A	YAP1	9606.ENSP00000326737	9606.ENSP00000478927	0	0	0	0	0	142	0	0	0	0	0	54	0	153
LRIG3	YAP1	9606.ENSP00000326759	9606.ENSP00000478927	0	0	0	0	0	215	0	0	0	0	0	0	58	228
FLNC	YAP1	9606.ENSP00000327145	9606.ENSP00000478927	0	0	0	0	0	195	0	0	64	0	0	46	43	220
PPM1A	YAP1	9606.ENSP00000327255	9606.ENSP00000478927	0	0	0	0	0	0	0	0	133	0	0	104	0	189
PAWR	YAP1	9606.ENSP00000328088	9606.ENSP00000478927	0	0	0	0	0	140	0	0	0	0	0	41	58	155
JAG2	YAP1	9606.ENSP00000328169	9606.ENSP00000478927	0	0	0	0	0	73	0	0	79	0	0	86	167	262
DNMT3B	YAP1	9606.ENSP00000328547	9606.ENSP00000478927	0	0	0	0	0	65	0	0	0	0	0	292	0	309
MOB2	YAP1	9606.ENSP00000328694	9606.ENSP00000478927	0	0	0	0	0	0	0	0	112	0	0	125	547	617
FMNL1	YAP1	9606.ENSP00000329219	9606.ENSP00000478927	0	0	0	0	0	0	64	0	187	0	0	0	63	224
KRT7	YAP1	9606.ENSP00000329243	9606.ENSP00000478927	0	0	0	0	0	139	0	0	0	0	0	52	44	151
COPB2	YAP1	9606.ENSP00000329419	9606.ENSP00000478927	0	0	0	0	0	0	63	0	101	0	0	73	0	150
TBK1	YAP1	9606.ENSP00000329967	9606.ENSP00000478927	0	0	0	0	0	0	0	328	96	0	0	58	0	377
BOLA2	YAP1	9606.ENSP00000331127	9606.ENSP00000478927	0	0	0	0	0	0	112	0	182	0	0	0	51	250
ANKRD45	YAP1	9606.ENSP00000331268	9606.ENSP00000478927	0	0	0	0	0	0	0	0	157	0	0	0	0	156
WT1	YAP1	9606.ENSP00000331327	9606.ENSP00000478927	0	0	0	0	0	0	50	0	68	0	0	124	59	172
PKP3	YAP1	9606.ENSP00000331678	9606.ENSP00000478927	0	0	0	0	0	140	62	0	50	0	0	0	0	166
GAS6	YAP1	9606.ENSP00000331831	9606.ENSP00000478927	0	0	0	0	0	87	0	0	0	0	0	108	50	158
EPHB3	YAP1	9606.ENSP00000332118	9606.ENSP00000478927	0	0	0	0	0	69	0	0	96	0	0	77	49	162
DSE	YAP1	9606.ENSP00000332151	9606.ENSP00000478927	0	0	0	0	0	0	0	0	0	0	0	93	104	152
PTP4A3	YAP1	9606.ENSP00000332274	9606.ENSP00000478927	0	0	0	0	0	0	0	0	0	0	0	56	211	223
ASCL2	YAP1	9606.ENSP00000332293	9606.ENSP00000478927	0	0	0	0	0	0	0	0	0	0	0	492	0	492
ZNF703	YAP1	9606.ENSP00000332325	9606.ENSP00000478927	0	0	0	0	0	70	0	0	0	0	0	138	0	164
PTCH1	YAP1	9606.ENSP00000332353	9606.ENSP00000478927	0	0	0	0	0	0	0	342	187	0	0	253	112	597
CRIP1	YAP1	9606.ENSP00000332449	9606.ENSP00000478927	0	0	0	0	0	0	0	0	64	0	0	0	521	532
SERPINA5	YAP1	9606.ENSP00000333203	9606.ENSP00000478927	0	0	0	0	0	98	0	0	0	0	0	111	0	163
SPNS2	YAP1	9606.ENSP00000333292	9606.ENSP00000478927	0	0	0	0	0	0	55	0	0	0	0	145	80	191
PRKD1	YAP1	9606.ENSP00000333568	9606.ENSP00000478927	0	0	0	0	0	87	0	521	0	0	0	69	175	619
TTF1	YAP1	9606.ENSP00000333920	9606.ENSP00000478927	0	0	0	0	0	0	0	0	138	0	0	66	0	160
PARVA	YAP1	9606.ENSP00000334008	9606.ENSP00000478927	0	0	0	0	0	255	0	0	0	0	0	0	0	254
KPNA4	YAP1	9606.ENSP00000334373	9606.ENSP00000478927	0	0	0	0	0	0	55	0	141	0	0	0	50	161
PTPRU	YAP1	9606.ENSP00000334941	9606.ENSP00000478927	0	0	0	0	0	152	0	0	81	0	0	0	0	187
ARID2	YAP1	9606.ENSP00000335044	9606.ENSP00000478927	0	0	0	0	0	0	63	0	0	0	0	135	0	154
HSP90AA1	YAP1	9606.ENSP00000335153	9606.ENSP00000478927	0	0	0	0	0	0	0	0	63	0	0	186	62	222
BCL9L	YAP1	9606.ENSP00000335320	9606.ENSP00000478927	0	0	0	0	0	76	0	166	0	0	0	60	0	212
CDKN3	YAP1	9606.ENSP00000335357	9606.ENSP00000478927	0	0	0	0	0	0	61	0	183	0	0	73	0	226
CDR2L	YAP1	9606.ENSP00000336587	9606.ENSP00000478927	0	0	0	0	0	152	0	0	0	0	0	0	0	151
LCK	YAP1	9606.ENSP00000337825	9606.ENSP00000478927	0	0	0	0	0	0	0	0	96	0	0	91	64	163
GDPD5	YAP1	9606.ENSP00000337972	9606.ENSP00000478927	0	0	0	0	0	0	0	0	0	0	0	136	66	158
SNTB2	YAP1	9606.ENSP00000338191	9606.ENSP00000478927	0	0	0	0	0	0	0	0	184	0	0	0	0	183
SNCA	YAP1	9606.ENSP00000338345	9606.ENSP00000478927	0	0	0	0	0	0	0	0	0	0	0	172	0	171
RHOBTB1	YAP1	9606.ENSP00000338671	9606.ENSP00000478927	0	0	0	0	0	76	0	0	84	0	0	88	101	213
STARD13	YAP1	9606.ENSP00000338785	9606.ENSP00000478927	0	0	0	0	0	88	0	0	0	0	0	136	0	178
SEC23B	YAP1	9606.ENSP00000338844	9606.ENSP00000478927	0	0	0	0	0	46	63	0	172	0	0	0	95	240
ZFAND4	YAP1	9606.ENSP00000339484	9606.ENSP00000478927	0	0	0	0	0	0	61	0	300	0	0	0	67	333
ARHGEF10	YAP1	9606.ENSP00000340297	9606.ENSP00000478927	0	0	0	0	0	97	61	0	0	0	0	0	174	238
ACVR2B	YAP1	9606.ENSP00000340361	9606.ENSP00000478927	0	0	0	0	0	0	0	0	96	0	0	83	151	234
MEF2C	YAP1	9606.ENSP00000340874	9606.ENSP00000478927	0	0	0	0	0	0	0	0	79	0	0	123	73	185
MIA3	YAP1	9606.ENSP00000340900	9606.ENSP00000478927	0	0	0	0	0	0	50	0	185	0	0	0	0	192
PTPN11	YAP1	9606.ENSP00000340944	9606.ENSP00000478927	0	0	0	0	0	0	62	0	169	0	0	172	0	298
SFN	YAP1	9606.ENSP00000340989	9606.ENSP00000478927	0	0	0	0	0	76	0	328	153	0	0	463	56	684
NTN4	YAP1	9606.ENSP00000340998	9606.ENSP00000478927	0	0	0	0	0	219	0	0	0	0	0	0	0	219
GSPT2	YAP1	9606.ENSP00000341247	9606.ENSP00000478927	0	0	0	0	0	0	0	0	129	0	0	0	66	151
RANBP3	YAP1	9606.ENSP00000341483	9606.ENSP00000478927	0	0	0	0	0	72	0	0	0	0	0	119	100	199
SYDE1	YAP1	9606.ENSP00000341489	9606.ENSP00000478927	0	0	0	0	0	299	0	0	185	0	0	0	0	404
SMAD4	YAP1	9606.ENSP00000341551	9606.ENSP00000478927	0	0	0	0	0	47	61	0	317	800	0	297	57	900
PPP1CC	YAP1	9606.ENSP00000341779	9606.ENSP00000478927	0	0	0	0	0	0	61	0	76	800	0	41	42	811
TP53BP2	YAP1	9606.ENSP00000341957	9606.ENSP00000478927	0	0	0	0	0	0	0	379	81	800	0	355	0	916
PRDX6	YAP1	9606.ENSP00000342026	9606.ENSP00000478927	0	0	0	0	0	65	0	45	82	0	0	266	50	324
DYRK2	YAP1	9606.ENSP00000342105	9606.ENSP00000478927	0	0	0	0	0	0	62	0	162	0	0	0	95	226
FERMT2	YAP1	9606.ENSP00000342858	9606.ENSP00000478927	0	0	0	0	0	244	0	0	0	0	0	87	0	280
UBE4B	YAP1	9606.ENSP00000343001	9606.ENSP00000478927	0	0	0	0	0	0	136	0	113	0	0	0	94	245
JAK1	YAP1	9606.ENSP00000343204	9606.ENSP00000478927	0	0	0	0	0	0	0	0	96	0	0	83	159	241
USP7	YAP1	9606.ENSP00000343535	9606.ENSP00000478927	0	0	0	0	0	0	82	0	172	0	0	69	101	278
MAP4K4	YAP1	9606.ENSP00000343658	9606.ENSP00000478927	0	0	0	0	0	0	0	0	62	0	0	161	85	217
KPNA1	YAP1	9606.ENSP00000343701	9606.ENSP00000478927	0	0	0	0	0	0	55	0	184	0	0	0	50	203
ATR	YAP1	9606.ENSP00000343741	9606.ENSP00000478927	0	0	0	0	0	0	89	0	89	0	0	100	0	187
FRMD6	YAP1	9606.ENSP00000343899	9606.ENSP00000478927	0	0	0	0	0	213	0	0	261	0	0	422	388	766
CTNNB1	YAP1	9606.ENSP00000344456	9606.ENSP00000478927	0	0	0	0	0	76	55	379	127	0	0	670	57	818
CCNG1	YAP1	9606.ENSP00000344635	9606.ENSP00000478927	0	0	0	0	0	0	0	0	181	0	0	64	44	203
FBXL5	YAP1	9606.ENSP00000344866	9606.ENSP00000478927	0	0	0	0	0	0	0	0	0	0	0	206	0	206
PRICKLE1	YAP1	9606.ENSP00000345064	9606.ENSP00000478927	0	0	0	0	0	0	62	0	64	0	0	0	128	167
MAP2K3	YAP1	9606.ENSP00000345083	9606.ENSP00000478927	0	0	0	0	0	0	0	0	0	0	0	74	176	204
UBQLN2	YAP1	9606.ENSP00000345195	9606.ENSP00000478927	0	0	0	0	0	0	57	794	191	0	0	161	58	853
RBPJ	YAP1	9606.ENSP00000345206	9606.ENSP00000478927	0	0	0	0	0	0	62	0	0	0	0	167	82	220
E2F1	YAP1	9606.ENSP00000345571	9606.ENSP00000478927	0	0	0	0	0	0	61	0	0	0	0	140	96	206
TEAD3	YAP1	9606.ENSP00000345772	9606.ENSP00000478927	0	0	0	0	0	257	0	377	730	900	0	575	406	996
ARHGAP12	YAP1	9606.ENSP00000345808	9606.ENSP00000478927	0	0	0	0	0	0	0	0	0	0	0	89	373	404
WLS	YAP1	9606.ENSP00000346829	9606.ENSP00000478927	0	0	0	0	0	152	0	0	0	0	0	0	0	151
MINK1	YAP1	9606.ENSP00000347427	9606.ENSP00000478927	0	0	0	0	0	0	0	0	62	0	0	112	85	171
ANO1	YAP1	9606.ENSP00000347454	9606.ENSP00000478927	0	0	0	0	0	140	0	0	0	0	0	59	0	156
ZFYVE19	YAP1	9606.ENSP00000347498	9606.ENSP00000478927	0	0	0	0	0	0	62	815	54	0	0	0	114	835
MKL1	YAP1	9606.ENSP00000347847	9606.ENSP00000478927	0	0	0	0	0	0	0	0	84	0	0	157	0	194
FAS	YAP1	9606.ENSP00000347979	9606.ENSP00000478927	0	0	0	0	0	0	0	192	0	0	0	81	0	225
PDLIM7	YAP1	9606.ENSP00000348099	9606.ENSP00000478927	0	0	0	0	0	65	63	166	0	0	0	61	142	304
PLS3	YAP1	9606.ENSP00000348163	9606.ENSP00000478927	0	0	0	0	0	299	0	0	64	0	0	0	43	317
STK39	YAP1	9606.ENSP00000348278	9606.ENSP00000478927	0	0	0	0	0	0	64	0	0	0	0	45	154	177
ADD3	YAP1	9606.ENSP00000348381	9606.ENSP00000478927	0	0	0	0	0	0	0	0	157	0	0	0	0	156
RAC1	YAP1	9606.ENSP00000348461	9606.ENSP00000478927	0	0	0	0	0	0	0	0	84	0	0	107	58	162
AMPH	YAP1	9606.ENSP00000348602	9606.ENSP00000478927	0	0	0	0	0	0	0	0	186	0	0	48	63	210
CRB3	YAP1	9606.ENSP00000349204	9606.ENSP00000478927	0	0	0	0	0	0	0	0	0	0	0	165	50	172
CALM1	YAP1	9606.ENSP00000349467	9606.ENSP00000478927	0	0	0	0	0	0	0	294	85	0	0	0	58	338
SCRIB	YAP1	9606.ENSP00000349486	9606.ENSP00000478927	0	0	0	0	0	0	55	0	0	0	0	400	204	509
UBE2D3	YAP1	9606.ENSP00000349722	9606.ENSP00000478927	0	0	0	0	0	0	60	0	312	0	0	282	69	509
PRIM1	YAP1	9606.ENSP00000350491	9606.ENSP00000478927	0	0	0	0	0	0	52	0	0	0	0	49	473	483
RAD23B	YAP1	9606.ENSP00000350708	9606.ENSP00000478927	0	0	0	0	0	70	57	0	191	0	0	0	55	239
EPHB4	YAP1	9606.ENSP00000350896	9606.ENSP00000478927	0	0	0	0	0	124	62	0	96	0	0	0	58	206
EPHA2	YAP1	9606.ENSP00000351209	9606.ENSP00000478927	0	0	0	0	0	332	0	0	96	0	0	150	69	458
ANKRD17	YAP1	9606.ENSP00000351416	9606.ENSP00000478927	0	0	0	0	0	0	61	0	186	0	0	69	173	332
NAALADL1	YAP1	9606.ENSP00000351484	9606.ENSP00000478927	0	0	0	0	0	0	0	0	141	0	0	0	68	165
FZD6	YAP1	9606.ENSP00000351605	9606.ENSP00000478927	0	0	0	0	0	102	0	0	64	0	0	69	62	167
REV3L	YAP1	9606.ENSP00000351697	9606.ENSP00000478927	0	0	0	0	0	0	96	0	0	0	0	69	87	164
FAM114A1	YAP1	9606.ENSP00000351740	9606.ENSP00000478927	0	0	0	0	0	117	0	0	0	0	0	105	63	194
VCP	YAP1	9606.ENSP00000351777	9606.ENSP00000478927	0	0	0	0	0	0	0	45	81	0	0	87	110	191
MYOF	YAP1	9606.ENSP00000352208	9606.ENSP00000478927	0	0	0	0	0	167	62	0	0	0	0	0	0	185
SLC2A10	YAP1	9606.ENSP00000352216	9606.ENSP00000478927	0	0	0	0	0	98	0	0	164	0	0	0	43	215
G3BP2	YAP1	9606.ENSP00000352738	9606.ENSP00000478927	0	0	0	0	0	0	0	0	85	0	0	189	449	555
MYO1C	YAP1	9606.ENSP00000352834	9606.ENSP00000478927	0	0	0	0	0	111	61	0	64	0	0	0	127	226
ATG2B	YAP1	9606.ENSP00000353010	9606.ENSP00000478927	0	0	0	0	0	0	144	0	0	0	0	0	63	163
MCMBP	YAP1	9606.ENSP00000353098	9606.ENSP00000478927	0	0	0	0	0	0	61	192	0	0	0	0	50	216
TFRC	YAP1	9606.ENSP00000353224	9606.ENSP00000478927	0	0	0	0	0	0	0	0	141	0	0	70	68	190
MYH10	YAP1	9606.ENSP00000353590	9606.ENSP00000478927	0	0	0	0	0	111	61	45	64	0	0	93	66	220
COL4A2	YAP1	9606.ENSP00000353654	9606.ENSP00000478927	0	0	0	0	0	333	0	0	0	0	0	0	57	344
ANKHD1	YAP1	9606.ENSP00000354085	9606.ENSP00000478927	0	0	0	0	0	0	61	0	186	0	0	528	173	662
ZNF219	YAP1	9606.ENSP00000354206	9606.ENSP00000478927	0	0	0	0	0	65	50	0	68	0	0	83	64	159
NCKAP1	YAP1	9606.ENSP00000354251	9606.ENSP00000478927	0	0	0	0	0	257	0	0	0	0	0	49	0	263
STAT1	YAP1	9606.ENSP00000354394	9606.ENSP00000478927	0	0	0	0	0	0	62	140	0	0	0	90	50	209
OPA1	YAP1	9606.ENSP00000354681	9606.ENSP00000478927	0	0	0	0	0	0	64	0	167	0	0	49	0	193
SMC3	YAP1	9606.ENSP00000354720	9606.ENSP00000478927	0	0	0	0	0	53	55	0	72	0	0	0	273	315
ZNF521	YAP1	9606.ENSP00000354794	9606.ENSP00000478927	0	0	0	0	0	63	50	0	68	900	0	0	0	905
CALD1	YAP1	9606.ENSP00000354826	9606.ENSP00000478927	0	0	0	0	0	336	0	0	0	0	0	116	0	387
CDC14A	YAP1	9606.ENSP00000354916	9606.ENSP00000478927	0	0	0	0	0	0	61	0	183	0	0	89	130	310
DMD	YAP1	9606.ENSP00000354923	9606.ENSP00000478927	0	0	0	0	0	0	0	0	64	0	0	212	69	253
CTR9	YAP1	9606.ENSP00000355013	9606.ENSP00000478927	0	0	0	0	0	0	64	0	85	0	0	0	98	160
TAF13	YAP1	9606.ENSP00000355051	9606.ENSP00000478927	0	0	0	0	0	0	0	0	190	0	0	0	0	190
ARHGEF10L	YAP1	9606.ENSP00000355060	9606.ENSP00000478927	0	0	0	0	0	0	61	0	0	0	0	99	227	288
COL6A1	YAP1	9606.ENSP00000355180	9606.ENSP00000478927	0	0	0	0	0	184	0	0	0	0	0	50	0	191
TSNAX	YAP1	9606.ENSP00000355599	9606.ENSP00000478927	0	0	0	0	0	0	0	223	0	0	0	0	0	223
RAB4A	YAP1	9606.ENSP00000355651	9606.ENSP00000478927	0	0	0	0	0	0	0	0	84	0	0	0	143	181
GUK1	YAP1	9606.ENSP00000355689	9606.ENSP00000478927	0	0	0	0	0	0	0	0	57	0	0	148	90	205
DLL1	YAP1	9606.ENSP00000355718	9606.ENSP00000478927	0	0	0	0	0	0	0	0	79	0	0	172	50	212
UBE2T	YAP1	9606.ENSP00000356243	9606.ENSP00000478927	0	0	0	0	0	0	60	0	312	0	0	0	69	345
CSRP1	YAP1	9606.ENSP00000356275	9606.ENSP00000478927	0	0	0	0	0	0	0	0	64	0	0	0	150	170
SHPRH	YAP1	9606.ENSP00000356475	9606.ENSP00000478927	0	0	0	0	0	0	109	0	82	0	0	0	50	155
RNASEL	YAP1	9606.ENSP00000356530	9606.ENSP00000478927	0	0	0	0	0	0	63	0	161	0	0	0	43	181
DDR2	YAP1	9606.ENSP00000356899	9606.ENSP00000478927	0	0	0	0	0	111	0	0	0	0	0	89	50	163
DUSP23	YAP1	9606.ENSP00000357087	9606.ENSP00000478927	0	0	0	0	0	0	61	0	183	0	0	0	0	200
ARHGAP18	YAP1	9606.ENSP00000357131	9606.ENSP00000478927	0	0	0	0	0	0	0	0	0	0	0	196	226	351
NES	YAP1	9606.ENSP00000357206	9606.ENSP00000478927	0	0	0	0	0	277	0	0	64	0	0	138	0	365
BGLAP	YAP1	9606.ENSP00000357255	9606.ENSP00000478927	0	0	0	0	0	0	0	0	0	900	0	82	0	904
LMNA	YAP1	9606.ENSP00000357283	9606.ENSP00000478927	0	0	0	0	0	77	0	0	0	0	0	212	0	241
KPNA5	YAP1	9606.ENSP00000357552	9606.ENSP00000478927	0	0	0	0	0	0	55	0	184	0	0	0	50	203
MKI67	YAP1	9606.ENSP00000357643	9606.ENSP00000478927	0	0	0	0	0	65	0	0	0	0	0	111	223	297
S100A16	YAP1	9606.ENSP00000357693	9606.ENSP00000478927	0	0	0	0	0	300	0	0	0	0	0	0	0	300
CDK19	YAP1	9606.ENSP00000357907	9606.ENSP00000478927	0	0	0	0	0	0	0	0	180	0	0	47	68	208
HSPA12A	YAP1	9606.ENSP00000358211	9606.ENSP00000478927	0	0	0	0	0	102	0	0	157	0	0	0	0	210
PNISR	YAP1	9606.ENSP00000358242	9606.ENSP00000478927	0	0	0	0	0	0	58	0	189	0	0	0	0	203
CASP7	YAP1	9606.ENSP00000358327	9606.ENSP00000478927	0	0	0	0	0	0	0	0	80	0	0	99	147	231
MAP3K7	YAP1	9606.ENSP00000358335	9606.ENSP00000478927	0	0	0	0	0	0	0	0	96	0	0	64	351	402
NRAS	YAP1	9606.ENSP00000358548	9606.ENSP00000478927	0	0	0	0	0	0	0	0	185	0	0	171	131	361
HIPK1	YAP1	9606.ENSP00000358571	9606.ENSP00000478927	0	0	0	0	0	0	62	0	186	0	0	0	204	339
UBL4A	YAP1	9606.ENSP00000358674	9606.ENSP00000478927	0	0	0	0	0	0	57	0	300	0	0	0	67	330
ME1	YAP1	9606.ENSP00000358719	9606.ENSP00000478927	0	0	0	0	0	77	0	0	130	0	0	0	0	162
AHCYL1	YAP1	9606.ENSP00000358814	9606.ENSP00000478927	0	0	0	0	0	63	0	227	0	0	0	0	0	244
FLNA	YAP1	9606.ENSP00000358866	9606.ENSP00000478927	0	0	0	0	0	65	0	0	64	0	0	212	43	251
SRPK3	YAP1	9606.ENSP00000359119	9606.ENSP00000478927	0	0	0	0	0	0	62	0	57	0	0	0	130	163
BTRC	YAP1	9606.ENSP00000359206	9606.ENSP00000478927	0	0	0	0	0	0	62	379	187	800	0	136	50	904
CNN3	YAP1	9606.ENSP00000359225	9606.ENSP00000478927	0	0	0	0	0	299	0	0	0	0	0	0	0	299
LZTS2	YAP1	9606.ENSP00000359240	9606.ENSP00000478927	0	0	0	0	0	70	0	0	0	0	0	74	108	164
HMGB3	YAP1	9606.ENSP00000359393	9606.ENSP00000478927	0	0	0	0	0	63	61	0	56	0	0	0	173	221
LRRC1	YAP1	9606.ENSP00000359925	9606.ENSP00000478927	0	0	0	0	0	0	0	0	0	0	0	0	204	204
GNG12	YAP1	9606.ENSP00000360021	9606.ENSP00000478927	0	0	0	0	0	363	0	0	0	0	0	70	0	382
JUN	YAP1	9606.ENSP00000360266	9606.ENSP00000478927	0	0	0	0	0	0	0	45	64	0	0	348	69	384
PRKAA2	YAP1	9606.ENSP00000360290	9606.ENSP00000478927	0	0	0	0	0	98	62	0	82	0	0	0	44	158
ZNF217	YAP1	9606.ENSP00000360526	9606.ENSP00000478927	0	0	0	0	0	0	50	0	68	0	0	126	85	197
UBE2A	YAP1	9606.ENSP00000360613	9606.ENSP00000478927	0	0	0	0	0	0	60	0	188	0	0	0	89	243
EPS15	YAP1	9606.ENSP00000360798	9606.ENSP00000478927	0	0	0	0	0	0	63	0	126	0	0	0	74	175
SLC2A6	YAP1	9606.ENSP00000360966	9606.ENSP00000478927	0	0	0	0	0	0	0	0	164	0	0	0	43	165
PTEN	YAP1	9606.ENSP00000361021	9606.ENSP00000478927	0	0	0	0	0	0	50	0	111	0	0	424	118	513
RAD54L	YAP1	9606.ENSP00000361043	9606.ENSP00000478927	0	0	0	0	0	0	62	0	82	0	0	49	89	154
BMPR1A	YAP1	9606.ENSP00000361107	9606.ENSP00000478927	0	0	0	0	0	77	49	0	175	0	0	0	73	238
HECTD3	YAP1	9606.ENSP00000361245	9606.ENSP00000478927	0	0	0	0	0	0	86	0	64	0	0	0	107	169
MMP9	YAP1	9606.ENSP00000361405	9606.ENSP00000478927	0	0	0	0	0	0	0	0	0	0	0	170	0	169
DLG5	YAP1	9606.ENSP00000361467	9606.ENSP00000478927	0	0	0	0	0	140	0	0	157	0	0	64	0	262
ASS1	YAP1	9606.ENSP00000361471	9606.ENSP00000478927	0	0	0	0	0	154	0	0	0	0	0	0	0	153
KDM4A	YAP1	9606.ENSP00000361473	9606.ENSP00000478927	0	0	0	0	0	0	109	0	0	0	0	106	50	177
PRRX2	YAP1	9606.ENSP00000361547	9606.ENSP00000478927	0	0	0	0	0	127	0	0	74	0	0	0	0	157
WBP5	YAP1	9606.ENSP00000361745	9606.ENSP00000478927	0	0	0	0	0	0	0	0	0	0	0	111	128	191
YWHAB	YAP1	9606.ENSP00000361930	9606.ENSP00000478927	0	0	0	0	0	0	0	379	185	900	0	107	56	949
UBR2	YAP1	9606.ENSP00000361990	9606.ENSP00000478927	0	0	0	0	0	0	96	0	126	0	0	87	84	250
DNM1	YAP1	9606.ENSP00000362014	9606.ENSP00000478927	0	0	0	0	0	0	64	0	167	0	0	54	58	212
CCND3	YAP1	9606.ENSP00000362082	9606.ENSP00000478927	0	0	0	0	0	0	0	0	0	0	0	85	227	262
SRPX2	YAP1	9606.ENSP00000362095	9606.ENSP00000478927	0	0	0	0	0	152	0	0	0	0	0	0	58	167
TSPAN6	YAP1	9606.ENSP00000362111	9606.ENSP00000478927	0	0	0	0	0	182	0	0	0	0	0	82	0	216
AGO3	YAP1	9606.ENSP00000362287	9606.ENSP00000478927	0	0	0	0	0	0	64	0	129	0	0	56	0	163
ENG	YAP1	9606.ENSP00000362299	9606.ENSP00000478927	0	0	0	0	0	0	0	0	0	0	0	415	0	415
AGO1	YAP1	9606.ENSP00000362300	9606.ENSP00000478927	0	0	0	0	0	0	64	0	129	0	0	71	0	176
PGK1	YAP1	9606.ENSP00000362413	9606.ENSP00000478927	0	0	0	0	0	0	48	0	0	0	0	104	86	152
ATRX	YAP1	9606.ENSP00000362441	9606.ENSP00000478927	0	0	0	0	0	0	62	0	82	0	0	92	44	152
SLC2A8	YAP1	9606.ENSP00000362469	9606.ENSP00000478927	0	0	0	0	0	0	0	0	164	0	0	0	43	165
HDAC1	YAP1	9606.ENSP00000362649	9606.ENSP00000478927	0	0	0	0	0	49	63	45	0	0	0	126	50	164
DENND1A	YAP1	9606.ENSP00000362727	9606.ENSP00000478927	0	0	0	0	0	0	53	0	0	0	0	511	115	554
OGT	YAP1	9606.ENSP00000362824	9606.ENSP00000478927	0	0	0	0	0	55	62	0	122	0	0	106	89	250
UBE2D1	YAP1	9606.ENSP00000363019	9606.ENSP00000478927	0	0	0	0	0	0	60	820	312	0	0	0	69	877
TLR4	YAP1	9606.ENSP00000363089	9606.ENSP00000478927	0	0	0	0	0	0	0	0	0	0	0	122	224	289
RBM12	YAP1	9606.ENSP00000363228	9606.ENSP00000478927	0	0	0	0	0	73	63	0	185	0	0	0	0	230
TXN	YAP1	9606.ENSP00000363641	9606.ENSP00000478927	0	0	0	0	0	0	0	0	50	0	0	458	0	463
PTPN3	YAP1	9606.ENSP00000363667	9606.ENSP00000478927	0	0	0	0	0	65	0	0	81	0	0	56	160	227
DAXX	YAP1	9606.ENSP00000363668	9606.ENSP00000478927	0	0	0	0	0	0	0	0	0	0	0	105	97	157
KLF4	YAP1	9606.ENSP00000363804	9606.ENSP00000478927	0	0	0	0	0	0	50	379	185	0	0	244	0	587
AR	YAP1	9606.ENSP00000363822	9606.ENSP00000478927	0	0	0	0	0	69	0	0	57	900	0	201	0	920
HSPG2	YAP1	9606.ENSP00000363827	9606.ENSP00000478927	0	0	0	0	0	141	61	0	0	0	0	61	0	176
PARD3	YAP1	9606.ENSP00000363921	9606.ENSP00000478927	0	0	0	0	0	184	0	166	127	0	0	198	104	495
MAP1LC3A	YAP1	9606.ENSP00000363970	9606.ENSP00000478927	0	0	0	0	0	0	62	0	169	0	0	0	43	188
COL5A2	YAP1	9606.ENSP00000364000	9606.ENSP00000478927	0	0	0	0	0	213	0	0	0	0	0	0	50	220
TGFBR1	YAP1	9606.ENSP00000364133	9606.ENSP00000478927	0	0	0	0	0	0	62	0	175	900	0	106	73	924
XPA	YAP1	9606.ENSP00000364270	9606.ENSP00000478927	0	0	0	0	0	0	0	0	0	0	0	220	0	220
C9orf3	YAP1	9606.ENSP00000364464	9606.ENSP00000478927	0	0	0	0	0	0	49	0	50	0	0	399	0	409
RBM7	YAP1	9606.ENSP00000364639	9606.ENSP00000478927	0	0	0	0	0	0	50	0	189	0	0	0	0	196
SDHB	YAP1	9606.ENSP00000364649	9606.ENSP00000478927	0	0	0	0	0	0	50	0	0	0	0	187	50	202
EHMT2	YAP1	9606.ENSP00000364678	9606.ENSP00000478927	0	0	0	0	0	0	55	0	107	0	0	83	0	158
MAPRE1	YAP1	9606.ENSP00000364721	9606.ENSP00000478927	0	0	0	0	0	46	0	0	0	0	0	41	204	208
RND3	YAP1	9606.ENSP00000364886	9606.ENSP00000478927	0	0	0	0	0	312	0	0	84	0	0	162	0	425
IRS2	YAP1	9606.ENSP00000365016	9606.ENSP00000478927	0	0	0	0	0	0	0	0	64	0	0	118	55	151
ISCA1	YAP1	9606.ENSP00000365159	9606.ENSP00000478927	0	0	0	0	0	0	0	0	0	0	0	163	0	163
UBQLN1	YAP1	9606.ENSP00000365576	9606.ENSP00000478927	0	0	0	0	0	0	57	0	191	0	0	52	58	227
BMI1	YAP1	9606.ENSP00000365851	9606.ENSP00000478927	0	0	0	0	0	0	61	0	0	0	0	267	55	292
GPC6	YAP1	9606.ENSP00000366246	9606.ENSP00000478927	0	0	0	0	0	140	0	0	0	0	0	86	50	188
UBD	YAP1	9606.ENSP00000366249	9606.ENSP00000478927	0	0	0	0	0	0	57	0	300	0	0	0	67	330
SYVN1	YAP1	9606.ENSP00000366395	9606.ENSP00000478927	0	0	0	0	0	0	0	0	131	0	0	0	73	159
ATG2A	YAP1	9606.ENSP00000366475	9606.ENSP00000478927	0	0	0	0	0	0	144	0	0	0	0	0	63	163
ERRFI1	YAP1	9606.ENSP00000366702	9606.ENSP00000478927	0	0	0	0	0	215	0	0	0	0	0	0	0	215
UCHL3	YAP1	9606.ENSP00000366819	9606.ENSP00000478927	0	0	0	0	0	0	49	784	0	0	0	0	50	787
DIS3	YAP1	9606.ENSP00000366997	9606.ENSP00000478927	0	0	0	0	0	184	63	0	0	0	0	0	0	202
KDM6A	YAP1	9606.ENSP00000367203	9606.ENSP00000478927	0	0	0	0	0	0	63	0	85	0	0	125	58	198
HSPA14	YAP1	9606.ENSP00000367623	9606.ENSP00000478927	0	0	0	0	0	49	0	0	157	0	0	50	0	171
ARHGEF16	YAP1	9606.ENSP00000367629	9606.ENSP00000478927	0	0	0	0	0	138	62	0	53	0	0	0	0	167
PAK7	YAP1	9606.ENSP00000367686	9606.ENSP00000478927	0	0	0	0	0	0	53	0	51	0	0	0	173	191
PLCB4	YAP1	9606.ENSP00000367762	9606.ENSP00000478927	0	0	0	0	0	77	0	0	0	0	0	422	0	444
SKI	YAP1	9606.ENSP00000367797	9606.ENSP00000478927	0	0	0	0	0	0	0	0	80	0	0	0	115	150
PODXL	YAP1	9606.ENSP00000367817	9606.ENSP00000478927	0	0	0	0	0	152	0	0	0	0	0	56	0	165
SHROOM1	YAP1	9606.ENSP00000367950	9606.ENSP00000478927	0	0	0	0	0	0	0	0	0	0	0	94	178	223
DVL1	YAP1	9606.ENSP00000368169	9606.ENSP00000478927	0	0	0	0	0	60	0	0	186	0	0	187	127	384
PRKD3	YAP1	9606.ENSP00000368356	9606.ENSP00000478927	0	0	0	0	0	0	0	0	0	0	0	73	439	457
ISG15	YAP1	9606.ENSP00000368699	9606.ENSP00000478927	0	0	0	0	0	0	57	0	300	0	0	0	67	330
RASSF2	YAP1	9606.ENSP00000368710	9606.ENSP00000478927	0	0	0	0	0	0	0	0	0	0	0	144	211	295
WBP4	YAP1	9606.ENSP00000368801	9606.ENSP00000478927	0	0	0	0	0	0	0	0	0	0	0	187	0	187
TOM1L2	YAP1	9606.ENSP00000368818	9606.ENSP00000478927	0	0	0	0	0	0	62	0	129	0	0	0	67	171
POSTN	YAP1	9606.ENSP00000369071	9606.ENSP00000478927	0	0	0	0	0	140	64	0	0	0	0	49	0	167
GLRX	YAP1	9606.ENSP00000369314	9606.ENSP00000478927	0	0	0	0	0	0	0	0	0	0	0	416	0	416
BRCA2	YAP1	9606.ENSP00000369497	9606.ENSP00000478927	0	0	0	0	0	0	0	0	0	0	0	193	57	206
CCDC85C	YAP1	9606.ENSP00000369592	9606.ENSP00000478927	0	0	0	0	0	0	0	377	0	0	0	116	0	425
PTPRA	YAP1	9606.ENSP00000369756	9606.ENSP00000478927	0	0	0	0	0	0	62	0	81	0	0	56	226	285
SLTM	YAP1	9606.ENSP00000369887	9606.ENSP00000478927	0	0	0	0	0	0	52	0	185	0	0	0	62	211
EBF4	YAP1	9606.ENSP00000370022	9606.ENSP00000478927	0	0	0	0	0	0	0	0	168	0	0	0	116	233
SERPINB1	YAP1	9606.ENSP00000370115	9606.ENSP00000478927	0	0	0	0	0	0	0	0	0	0	0	49	177	183
RABGEF1	YAP1	9606.ENSP00000370208	9606.ENSP00000478927	0	0	0	0	0	0	107	0	158	0	0	0	58	229
FOXC1	YAP1	9606.ENSP00000370256	9606.ENSP00000478927	0	0	0	0	0	127	0	0	0	0	0	46	82	168
SHROOM2	YAP1	9606.ENSP00000370299	9606.ENSP00000478927	0	0	0	0	0	111	55	0	0	0	0	0	128	203
RUFY3	YAP1	9606.ENSP00000370394	9606.ENSP00000478927	0	0	0	0	0	0	0	0	0	0	0	0	222	222
SGTB	YAP1	9606.ENSP00000370395	9606.ENSP00000478927	0	0	0	0	0	0	0	0	185	0	0	0	50	192
POLR2B	YAP1	9606.ENSP00000370625	9606.ENSP00000478927	0	0	0	0	0	0	84	0	185	0	0	0	43	223
THUMPD1	YAP1	9606.ENSP00000370741	9606.ENSP00000478927	0	0	0	0	0	0	0	387	0	0	0	0	0	386
E2F6	YAP1	9606.ENSP00000370936	9606.ENSP00000478927	0	0	0	0	0	0	61	0	0	0	0	125	58	158
CDK8	YAP1	9606.ENSP00000370938	9606.ENSP00000478927	0	0	0	0	0	0	0	0	180	0	0	210	68	343
YWHAQ	YAP1	9606.ENSP00000371267	9606.ENSP00000478927	0	0	0	0	0	0	0	379	180	600	0	68	58	788
TNK2	YAP1	9606.ENSP00000371341	9606.ENSP00000478927	0	0	0	0	0	0	0	0	185	0	0	64	87	242
GLIS3	YAP1	9606.ENSP00000371398	9606.ENSP00000478927	0	0	0	0	0	76	50	0	68	0	0	84	0	150
SOD3	YAP1	9606.ENSP00000371554	9606.ENSP00000478927	0	0	0	0	0	130	0	0	0	0	0	74	0	159
NYNRIN	YAP1	9606.ENSP00000371994	9606.ENSP00000478927	0	0	0	0	0	86	0	0	77	0	0	110	93	227
CHEK2	YAP1	9606.ENSP00000372023	9606.ENSP00000478927	0	0	0	0	0	0	64	0	70	0	0	217	0	258
WHSC1	YAP1	9606.ENSP00000372351	9606.ENSP00000478927	0	0	0	0	0	0	0	0	107	0	0	116	58	191
GPX3	YAP1	9606.ENSP00000373477	9606.ENSP00000478927	0	0	0	0	0	0	0	0	0	0	0	473	0	473
KRT18	YAP1	9606.ENSP00000373487	9606.ENSP00000478927	0	0	0	0	0	212	0	0	0	0	0	146	116	353
STK38L	YAP1	9606.ENSP00000373684	9606.ENSP00000478927	0	0	0	0	0	0	61	0	0	0	0	227	448	564
TRIP12	YAP1	9606.ENSP00000373696	9606.ENSP00000478927	0	0	0	0	0	46	118	0	0	0	0	0	402	452
LOXL2	YAP1	9606.ENSP00000373783	9606.ENSP00000478927	0	0	0	0	0	127	0	0	0	0	0	69	0	152
SUMO1	YAP1	9606.ENSP00000376077	9606.ENSP00000478927	0	0	0	0	0	45	0	379	0	0	0	64	87	425
TAOK3	YAP1	9606.ENSP00000376317	9606.ENSP00000478927	0	0	0	0	0	0	55	0	188	0	0	61	215	358
WIPF1	YAP1	9606.ENSP00000376330	9606.ENSP00000478927	0	0	0	0	0	0	0	0	158	0	0	0	44	160
LLGL2	YAP1	9606.ENSP00000376333	9606.ENSP00000478927	0	0	0	0	0	0	66	0	0	0	0	166	217	336
ETS1	YAP1	9606.ENSP00000376436	9606.ENSP00000478927	0	0	0	0	0	0	0	0	0	0	0	162	55	174
MTPN	YAP1	9606.ENSP00000376800	9606.ENSP00000478927	0	0	0	0	0	0	51	0	80	0	0	54	104	160
CUL5	YAP1	9606.ENSP00000376808	9606.ENSP00000478927	0	0	0	0	0	0	63	0	80	0	0	104	62	178
PTGFRN	YAP1	9606.ENSP00000376899	9606.ENSP00000478927	0	0	0	0	0	152	0	0	0	0	0	0	0	151
SPOP	YAP1	9606.ENSP00000377001	9606.ENSP00000478927	0	0	0	0	0	0	62	0	101	0	0	79	63	174
PPP2R4	YAP1	9606.ENSP00000377036	9606.ENSP00000478927	0	0	0	0	0	0	0	0	0	0	0	164	0	163
LONRF2	YAP1	9606.ENSP00000377086	9606.ENSP00000478927	0	0	0	0	0	0	58	0	157	0	0	0	69	196
MON2	YAP1	9606.ENSP00000377250	9606.ENSP00000478927	0	0	0	0	0	0	117	0	85	0	0	0	59	173
SRPK2	YAP1	9606.ENSP00000377262	9606.ENSP00000478927	0	0	0	0	0	0	62	0	57	0	0	47	235	268
PPP6R3	YAP1	9606.ENSP00000377390	9606.ENSP00000478927	0	0	0	0	0	0	65	0	0	0	0	63	250	285
HMMR	YAP1	9606.ENSP00000377492	9606.ENSP00000478927	0	0	0	0	0	65	0	0	0	0	0	54	161	193
JUP	YAP1	9606.ENSP00000377508	9606.ENSP00000478927	0	0	0	0	0	69	0	0	127	0	0	85	0	191
HELLS	YAP1	9606.ENSP00000377601	9606.ENSP00000478927	0	0	0	0	0	0	62	0	82	0	0	104	44	163
FAT4	YAP1	9606.ENSP00000377862	9606.ENSP00000478927	0	0	0	0	0	142	0	0	85	0	0	422	226	601
EFEMP1	YAP1	9606.ENSP00000378058	9606.ENSP00000478927	0	0	0	0	0	215	0	0	79	0	0	60	0	261
RAB3IL1	YAP1	9606.ENSP00000378313	9606.ENSP00000478927	0	0	0	0	0	77	0	0	0	0	0	0	160	191
GIT1	YAP1	9606.ENSP00000378338	9606.ENSP00000478927	0	0	0	0	0	0	50	0	0	0	0	101	116	179
DAAM1	YAP1	9606.ENSP00000378557	9606.ENSP00000478927	0	0	0	0	0	0	64	0	132	0	0	79	68	209
CDK1	YAP1	9606.ENSP00000378699	9606.ENSP00000478927	0	0	0	0	0	73	51	0	85	0	0	555	247	681
PPP1CB	YAP1	9606.ENSP00000378769	9606.ENSP00000478927	0	0	0	0	0	0	61	0	76	800	0	58	0	814
PSPH	YAP1	9606.ENSP00000378854	9606.ENSP00000478927	0	0	0	0	0	0	0	0	57	0	0	99	91	160
SNTB1	YAP1	9606.ENSP00000378965	9606.ENSP00000478927	0	0	0	0	0	0	0	0	184	0	0	41	0	183
APIP	YAP1	9606.ENSP00000379133	9606.ENSP00000478927	0	0	0	0	0	0	0	0	617	0	0	0	56	622
UBFD1	YAP1	9606.ENSP00000379217	9606.ENSP00000478927	0	0	0	0	0	65	0	0	127	0	0	0	108	208
YWHAZ	YAP1	9606.ENSP00000379287	9606.ENSP00000478927	0	0	0	0	0	0	0	379	185	600	0	492	56	885
MOB1A	YAP1	9606.ENSP00000379364	9606.ENSP00000478927	0	0	0	0	0	0	61	0	190	900	0	654	443	982
MOB1B	YAP1	9606.ENSP00000379366	9606.ENSP00000478927	0	0	0	0	0	0	61	0	190	900	0	588	443	979
TAX1BP1	YAP1	9606.ENSP00000379612	9606.ENSP00000478927	0	0	0	0	0	0	0	0	71	0	0	351	0	371
ILK	YAP1	9606.ENSP00000379975	9606.ENSP00000478927	0	0	0	0	0	0	51	0	80	0	0	116	82	196
DDX17	YAP1	9606.ENSP00000380033	9606.ENSP00000478927	0	0	0	0	0	72	0	320	167	0	0	172	49	510
SNAI2	YAP1	9606.ENSP00000380034	9606.ENSP00000478927	0	0	0	0	0	214	0	0	0	0	0	619	57	693
PAFAH1B1	YAP1	9606.ENSP00000380378	9606.ENSP00000478927	0	0	0	0	0	0	63	125	0	0	0	73	75	202
WNT5B	YAP1	9606.ENSP00000380379	9606.ENSP00000478927	0	0	0	0	0	65	0	0	0	0	0	105	130	208
HAGH	YAP1	9606.ENSP00000380514	9606.ENSP00000478927	0	0	0	0	0	0	0	0	0	0	0	104	110	168
TSPAN4	YAP1	9606.ENSP00000380553	9606.ENSP00000478927	0	0	0	0	0	65	0	0	0	0	0	55	317	343
CD151	YAP1	9606.ENSP00000380565	9606.ENSP00000478927	0	0	0	0	0	76	0	0	0	0	0	111	93	189
KDM7A	YAP1	9606.ENSP00000380692	9606.ENSP00000478927	0	0	0	0	0	0	63	0	82	0	0	70	82	167
RASSF7	YAP1	9606.ENSP00000380713	9606.ENSP00000478927	0	0	0	0	0	0	0	0	80	0	0	123	84	196
SEPT10	YAP1	9606.ENSP00000380824	9606.ENSP00000478927	0	0	0	0	0	305	0	0	84	0	0	0	0	336
SOCS6	YAP1	9606.ENSP00000381034	9606.ENSP00000478927	0	0	0	0	0	75	0	379	0	0	0	401	0	626
TMEM123	YAP1	9606.ENSP00000381204	9606.ENSP00000478927	0	0	0	0	0	0	0	0	0	0	0	246	0	245
VGLL3	YAP1	9606.ENSP00000381436	9606.ENSP00000478927	0	0	0	0	0	65	49	0	85	0	0	645	0	672
LARP4	YAP1	9606.ENSP00000381490	9606.ENSP00000478927	0	0	0	0	0	0	61	0	185	0	0	0	0	201
USP34	YAP1	9606.ENSP00000381577	9606.ENSP00000478927	0	0	0	0	0	0	82	0	121	0	0	104	57	226
MX1	YAP1	9606.ENSP00000381601	9606.ENSP00000478927	0	0	0	0	0	0	64	0	167	0	0	0	99	236
CTNND1	YAP1	9606.ENSP00000382004	9606.ENSP00000478927	0	0	0	0	0	152	62	320	50	0	0	116	0	462
DOPEY2	YAP1	9606.ENSP00000382104	9606.ENSP00000478927	0	0	0	0	0	0	94	0	145	0	0	0	0	192
RBM12B	YAP1	9606.ENSP00000382239	9606.ENSP00000478927	0	0	0	0	0	0	63	0	185	0	0	0	0	203
MAP3K1	YAP1	9606.ENSP00000382423	9606.ENSP00000478927	0	0	0	0	0	0	63	0	62	0	0	282	57	325
CDIP1	YAP1	9606.ENSP00000382508	9606.ENSP00000478927	0	0	0	0	0	0	0	0	186	0	0	0	102	237
PAICS	YAP1	9606.ENSP00000382595	9606.ENSP00000478927	0	0	0	0	0	65	0	45	0	0	0	139	0	164
RUNX3	YAP1	9606.ENSP00000382800	9606.ENSP00000478927	0	0	0	0	0	0	0	379	64	900	0	162	112	948
DDX3X	YAP1	9606.ENSP00000382840	9606.ENSP00000478927	0	0	0	0	0	0	61	45	102	0	0	167	49	245
L3MBTL4	YAP1	9606.ENSP00000382976	9606.ENSP00000478927	0	0	0	0	0	0	59	0	186	0	0	0	50	208
KDM1A	YAP1	9606.ENSP00000383042	9606.ENSP00000478927	0	0	0	0	0	0	62	0	0	0	0	118	62	156
USP25	YAP1	9606.ENSP00000383044	9606.ENSP00000478927	0	0	0	0	0	0	82	0	172	0	0	41	101	256
CDC42	YAP1	9606.ENSP00000383118	9606.ENSP00000478927	0	0	0	0	0	0	0	0	84	0	0	243	58	289
DIAPH3	YAP1	9606.ENSP00000383178	9606.ENSP00000478927	0	0	0	0	0	69	0	0	0	0	0	105	203	277
GGT1	YAP1	9606.ENSP00000383232	9606.ENSP00000478927	0	0	0	0	0	0	61	0	0	0	0	127	49	152
RDX	YAP1	9606.ENSP00000384136	9606.ENSP00000478927	0	0	0	0	0	88	0	0	166	0	0	269	130	451
KIF16B	YAP1	9606.ENSP00000384164	9606.ENSP00000478927	0	0	0	0	0	0	79	0	87	0	0	0	75	154
WWC2	YAP1	9606.ENSP00000384222	9606.ENSP00000478927	0	0	0	0	563	213	0	0	185	0	0	151	407	463
RELA	YAP1	9606.ENSP00000384273	9606.ENSP00000478927	0	0	0	0	0	0	0	0	0	0	0	284	0	284
ACY1	YAP1	9606.ENSP00000384296	9606.ENSP00000478927	0	0	0	0	0	0	0	0	170	0	0	0	96	217
CDKN1A	YAP1	9606.ENSP00000384849	9606.ENSP00000478927	0	0	0	0	0	0	0	0	0	0	0	206	0	206
NOLC1	YAP1	9606.ENSP00000385410	9606.ENSP00000478927	0	0	0	0	0	0	0	0	190	0	0	90	158	325
IL6	YAP1	9606.ENSP00000385675	9606.ENSP00000478927	0	0	0	0	0	0	0	0	0	0	0	186	43	187
GGT2	YAP1	9606.ENSP00000385721	9606.ENSP00000478927	0	0	0	0	0	0	61	0	0	0	0	138	49	163
FOXO3	YAP1	9606.ENSP00000385824	9606.ENSP00000478927	0	0	0	0	0	0	61	0	0	0	0	211	99	274
KCNS3	YAP1	9606.ENSP00000385968	9606.ENSP00000478927	0	0	0	0	0	137	61	0	50	0	0	0	0	162
LTBP1	YAP1	9606.ENSP00000386043	9606.ENSP00000478927	0	0	0	0	0	198	0	0	79	0	0	0	0	229
GULP1	YAP1	9606.ENSP00000386289	9606.ENSP00000478927	0	0	0	0	0	152	0	0	57	0	0	0	64	186
PRPF40A	YAP1	9606.ENSP00000386458	9606.ENSP00000478927	0	0	0	0	0	47	61	0	0	0	0	197	68	240
ZC3H8	YAP1	9606.ENSP00000386488	9606.ENSP00000478927	0	0	0	0	0	0	0	0	178	0	0	0	43	179
SETD2	YAP1	9606.ENSP00000386759	9606.ENSP00000478927	0	0	0	0	0	45	85	0	107	0	0	125	0	225
ACTG2	YAP1	9606.ENSP00000386857	9606.ENSP00000478927	0	0	0	0	0	65	0	0	85	0	0	64	85	169
ITGA6	YAP1	9606.ENSP00000386896	9606.ENSP00000478927	0	0	0	0	0	111	0	0	0	0	0	243	49	304
KDELR3	YAP1	9606.ENSP00000386918	9606.ENSP00000478927	0	0	0	0	0	139	61	0	64	0	0	0	0	177
UBE4A	YAP1	9606.ENSP00000387362	9606.ENSP00000478927	0	0	0	0	0	0	136	0	113	0	0	0	94	245
CREB1	YAP1	9606.ENSP00000387699	9606.ENSP00000478927	0	0	0	0	0	42	0	379	0	0	0	210	0	488
RARG	YAP1	9606.ENSP00000388510	9606.ENSP00000478927	0	0	0	0	0	70	0	379	57	0	0	166	57	493
CHEK1	YAP1	9606.ENSP00000388648	9606.ENSP00000478927	0	0	0	0	0	0	62	0	52	0	0	207	120	296
PPP1R12A	YAP1	9606.ENSP00000389168	9606.ENSP00000478927	0	0	0	0	0	0	51	0	80	0	0	161	129	276
SEPT5	YAP1	9606.ENSP00000391311	9606.ENSP00000478927	0	0	0	0	0	0	0	0	152	0	0	0	0	151
AGR2	YAP1	9606.ENSP00000391490	9606.ENSP00000478927	0	0	0	0	0	76	0	0	0	0	0	209	65	256
PTPN6	YAP1	9606.ENSP00000391592	9606.ENSP00000478927	0	0	0	0	0	0	0	0	169	0	0	0	0	169
BCAR1	YAP1	9606.ENSP00000391669	9606.ENSP00000478927	0	0	0	0	0	214	0	0	0	0	0	46	70	241
IGF2	YAP1	9606.ENSP00000391826	9606.ENSP00000478927	0	0	0	0	0	98	0	0	0	0	0	206	0	253
CHD7	YAP1	9606.ENSP00000392028	9606.ENSP00000478927	0	0	0	0	0	0	81	0	82	0	0	208	50	280
ARHGAP28	YAP1	9606.ENSP00000392660	9606.ENSP00000478927	0	0	0	0	0	0	0	0	0	0	0	111	204	262
FGFR1	YAP1	9606.ENSP00000393312	9606.ENSP00000478927	0	0	0	0	0	88	0	0	90	0	0	508	0	556
BIRC6	YAP1	9606.ENSP00000393596	9606.ENSP00000478927	0	0	0	0	0	0	60	0	262	0	0	41	105	324
PRKD2	YAP1	9606.ENSP00000393978	9606.ENSP00000478927	0	0	0	0	0	0	0	0	0	0	0	0	175	175
PDZK1	YAP1	9606.ENSP00000394485	9606.ENSP00000478927	0	0	0	0	0	0	0	0	127	0	0	0	90	171
MAPK9	YAP1	9606.ENSP00000394560	9606.ENSP00000478927	0	0	0	0	0	0	61	0	0	0	0	210	341	468
PTPN13	YAP1	9606.ENSP00000394794	9606.ENSP00000478927	0	0	0	0	0	138	0	0	81	0	0	110	0	233
ARFIP1	YAP1	9606.ENSP00000395083	9606.ENSP00000478927	0	0	0	0	0	0	0	220	0	0	0	0	0	220
ACTL6A	YAP1	9606.ENSP00000397552	9606.ENSP00000478927	0	0	0	0	0	0	0	45	79	0	0	146	85	220
E2F5	YAP1	9606.ENSP00000398124	9606.ENSP00000478927	0	0	0	0	0	0	61	0	0	0	0	147	173	279
CYR61	YAP1	9606.ENSP00000398736	9606.ENSP00000478927	0	0	0	0	0	366	0	0	0	0	0	583	64	730
KMT2B	YAP1	9606.ENSP00000398837	9606.ENSP00000478927	0	0	0	0	0	0	61	0	107	0	0	211	0	280
KLC2	YAP1	9606.ENSP00000399403	9606.ENSP00000478927	0	0	0	0	0	0	50	0	85	0	0	76	211	281
MBIP	YAP1	9606.ENSP00000399718	9606.ENSP00000478927	0	0	0	0	0	0	0	0	0	0	0	144	93	190
TEN1-CDK3	YAP1	9606.ENSP00000400088	9606.ENSP00000478927	0	0	0	0	0	0	51	0	85	0	0	74	94	174
EWSR1	YAP1	9606.ENSP00000400142	9606.ENSP00000478927	0	0	0	0	0	53	51	0	0	0	0	139	0	158
FOXA2	YAP1	9606.ENSP00000400341	9606.ENSP00000478927	0	0	0	0	0	0	0	0	0	0	0	172	0	171
ECD	YAP1	9606.ENSP00000401566	9606.ENSP00000478927	0	0	0	0	0	0	63	0	0	0	0	246	69	284
PDZD2	YAP1	9606.ENSP00000402033	9606.ENSP00000478927	0	0	0	0	0	0	0	0	157	0	0	0	0	156
LAPTM4B	YAP1	9606.ENSP00000402301	9606.ENSP00000478927	0	0	0	0	0	157	0	0	95	0	0	0	0	204
ACTA2	YAP1	9606.ENSP00000402373	9606.ENSP00000478927	0	0	0	0	0	0	61	0	85	0	0	170	85	260
SMG1	YAP1	9606.ENSP00000402515	9606.ENSP00000478927	0	0	0	0	0	0	112	0	182	0	0	0	51	250
FAM58A	YAP1	9606.ENSP00000402949	9606.ENSP00000478927	0	0	0	0	0	0	0	0	182	0	0	0	0	181
PHTF2	YAP1	9606.ENSP00000403042	9606.ENSP00000478927	0	0	0	0	0	0	61	0	0	0	0	93	87	154
PPP1R13L	YAP1	9606.ENSP00000403902	9606.ENSP00000478927	0	0	0	0	0	63	0	0	81	0	0	108	0	164
RACGAP1	YAP1	9606.ENSP00000404190	9606.ENSP00000478927	0	0	0	0	0	65	55	0	0	0	0	92	69	153
BBC3	YAP1	9606.ENSP00000404503	9606.ENSP00000478927	0	0	0	0	0	0	0	0	0	0	0	297	0	297
PGGT1B	YAP1	9606.ENSP00000404676	9606.ENSP00000478927	0	0	0	0	0	0	0	0	261	0	0	0	0	261
ESRP1	YAP1	9606.ENSP00000405738	9606.ENSP00000478927	0	0	0	0	0	88	0	0	0	0	0	85	102	185
GPX1	YAP1	9606.ENSP00000407375	9606.ENSP00000478927	0	0	0	0	0	0	0	0	0	0	0	160	0	159
HRAS	YAP1	9606.ENSP00000407586	9606.ENSP00000478927	0	0	0	0	0	0	0	0	185	0	0	654	131	733
SLC9A3R2	YAP1	9606.ENSP00000408005	9606.ENSP00000478927	0	0	0	0	0	96	0	379	127	0	0	238	57	583
CLDN4	YAP1	9606.ENSP00000409544	9606.ENSP00000478927	0	0	0	0	0	76	0	0	0	0	0	170	65	220
FGFR2	YAP1	9606.ENSP00000410294	9606.ENSP00000478927	0	0	0	0	0	67	0	0	90	0	0	143	0	208
CMSS1	YAP1	9606.ENSP00000410396	9606.ENSP00000478927	0	0	0	0	0	0	0	0	162	0	0	0	0	161
ITPKB	YAP1	9606.ENSP00000411152	9606.ENSP00000478927	0	0	0	0	0	0	0	0	0	0	0	62	318	332
MARK3	YAP1	9606.ENSP00000411397	9606.ENSP00000478927	0	0	0	0	0	0	0	0	133	0	0	74	50	170
RBFOX2	YAP1	9606.ENSP00000413035	9606.ENSP00000478927	0	0	0	0	0	275	0	0	0	0	0	0	65	293
HID1	YAP1	9606.ENSP00000413520	9606.ENSP00000478927	0	0	0	0	0	0	59	0	261	0	0	0	44	277
TOM1	YAP1	9606.ENSP00000413697	9606.ENSP00000478927	0	0	0	0	0	0	62	140	129	0	0	0	67	256
C11orf70	YAP1	9606.ENSP00000414390	9606.ENSP00000478927	0	0	366	0	0	0	0	0	0	0	0	123	0	420
CBFB	YAP1	9606.ENSP00000415151	9606.ENSP00000478927	0	0	0	0	0	0	0	0	0	900	0	0	0	900
SLC2A1	YAP1	9606.ENSP00000416293	9606.ENSP00000478927	0	0	0	0	0	69	55	0	0	0	0	186	0	221
FHIT	YAP1	9606.ENSP00000417480	9606.ENSP00000478927	0	0	0	0	0	0	0	0	0	0	0	220	0	220
PPM1L	YAP1	9606.ENSP00000417659	9606.ENSP00000478927	0	0	0	0	0	0	62	0	133	0	0	0	0	151
PPP2CA	YAP1	9606.ENSP00000418447	9606.ENSP00000478927	0	0	0	0	0	0	50	0	71	600	0	41	69	627
CDKN2A	YAP1	9606.ENSP00000418915	9606.ENSP00000478927	0	0	0	0	0	0	51	0	84	0	0	346	0	381
WWTR1	YAP1	9606.ENSP00000419465	9606.ENSP00000478927	0	0	0	0	910	213	55	348	185	900	0	787	102	956
NUDT5	YAP1	9606.ENSP00000419628	9606.ENSP00000478927	0	0	0	0	0	0	59	324	0	0	0	0	0	336
RAB9A	YAP1	9606.ENSP00000420127	9606.ENSP00000478927	0	0	0	0	0	0	61	0	0	0	0	52	172	198
NACAD	YAP1	9606.ENSP00000420477	9606.ENSP00000478927	0	0	0	0	0	0	0	0	158	0	0	0	43	159
MFN1	YAP1	9606.ENSP00000420617	9606.ENSP00000478927	0	0	0	0	0	0	144	0	167	0	0	45	55	270
GPX8	YAP1	9606.ENSP00000423822	9606.ENSP00000478927	0	0	0	0	0	269	0	0	0	0	0	135	0	340
FBN2	YAP1	9606.ENSP00000424571	9606.ENSP00000478927	0	0	0	0	0	76	0	0	79	0	0	0	105	171
NEDD4	YAP1	9606.ENSP00000424827	9606.ENSP00000478927	0	0	0	0	577	0	61	0	160	0	0	330	62	287
INPP4B	YAP1	9606.ENSP00000425487	9606.ENSP00000478927	0	0	0	0	0	0	0	0	0	0	0	96	183	229
PALLD	YAP1	9606.ENSP00000425556	9606.ENSP00000478927	0	0	0	0	0	166	0	0	0	0	0	64	41	186
SMAD1	YAP1	9606.ENSP00000426568	9606.ENSP00000478927	0	0	0	0	0	0	0	294	317	800	0	74	204	915
PROM1	YAP1	9606.ENSP00000426809	9606.ENSP00000478927	0	0	0	0	0	0	62	0	0	0	0	579	0	589
RAI14	YAP1	9606.ENSP00000427123	9606.ENSP00000478927	0	0	0	0	0	329	51	0	80	0	0	0	0	363
WWP1	YAP1	9606.ENSP00000427793	9606.ENSP00000478927	0	0	0	0	566	0	0	0	160	0	0	246	84	250
LY6E	YAP1	9606.ENSP00000428572	9606.ENSP00000478927	0	0	0	0	0	0	0	0	0	0	0	291	0	290
CCNC	YAP1	9606.ENSP00000428982	9606.ENSP00000478927	0	0	0	0	0	0	0	0	108	0	0	124	44	187
L3MBTL3	YAP1	9606.ENSP00000431962	9606.ENSP00000478927	0	0	0	0	0	0	59	0	186	0	0	0	50	208
HSPA8	YAP1	9606.ENSP00000432083	9606.ENSP00000478927	0	0	0	0	0	0	0	0	157	0	0	0	0	156
USP47	YAP1	9606.ENSP00000433146	9606.ENSP00000478927	0	0	0	0	0	0	82	0	121	0	0	0	57	172
FAM118B	YAP1	9606.ENSP00000433343	9606.ENSP00000478927	0	0	0	0	0	0	0	0	0	0	0	413	0	412
ST5	YAP1	9606.ENSP00000433528	9606.ENSP00000478927	0	0	0	0	0	137	53	0	0	0	0	57	0	162
TRAF6	YAP1	9606.ENSP00000433623	9606.ENSP00000478927	0	0	0	0	0	0	59	0	56	0	0	232	42	258
H2AFX	YAP1	9606.ENSP00000434024	9606.ENSP00000478927	0	0	0	0	0	0	0	0	57	0	0	145	0	159
TEAD1	YAP1	9606.ENSP00000435233	9606.ENSP00000478927	0	0	0	0	0	417	51	379	737	900	0	828	406	998
DICER1	YAP1	9606.ENSP00000437256	9606.ENSP00000478927	0	0	0	0	0	0	62	0	0	0	0	163	100	231
KPNA2	YAP1	9606.ENSP00000438483	9606.ENSP00000478927	0	0	0	0	0	60	55	45	185	0	0	0	50	223
MPDZ	YAP1	9606.ENSP00000439807	9606.ENSP00000478927	0	0	0	0	0	214	0	166	162	0	0	312	109	601
PACSIN3	YAP1	9606.ENSP00000440945	9606.ENSP00000478927	0	0	0	0	0	159	0	0	84	0	0	0	0	196
NNMT	YAP1	9606.ENSP00000441434	9606.ENSP00000478927	0	0	0	0	0	156	0	0	0	0	0	46	43	162
UBC	YAP1	9606.ENSP00000441543	9606.ENSP00000478927	0	0	0	0	0	0	57	0	300	0	0	41	125	371
PTHLH	YAP1	9606.ENSP00000441765	9606.ENSP00000478927	0	0	0	0	0	98	0	0	0	0	0	79	174	253
PCDH7	YAP1	9606.ENSP00000441802	9606.ENSP00000478927	0	0	0	0	0	132	0	0	54	0	0	56	0	157
SMAD5	YAP1	9606.ENSP00000441954	9606.ENSP00000478927	0	0	0	0	0	76	0	238	317	0	0	83	204	584
PCYT2	YAP1	9606.ENSP00000442050	9606.ENSP00000478927	0	0	0	0	0	0	51	0	50	0	0	60	407	430
SETD1B	YAP1	9606.ENSP00000442924	9606.ENSP00000478927	0	0	0	0	0	0	49	0	177	0	0	0	77	214
LPAR2	YAP1	9606.ENSP00000443256	9606.ENSP00000478927	0	0	0	0	0	0	51	0	58	0	0	62	109	152
BCAT1	YAP1	9606.ENSP00000443459	9606.ENSP00000478927	0	0	0	0	0	0	0	0	0	0	0	78	129	162
PLCB3	YAP1	9606.ENSP00000443631	9606.ENSP00000478927	0	0	0	0	0	76	0	0	0	0	0	0	140	171
PRRG1	YAP1	9606.ENSP00000444278	9606.ENSP00000478927	0	0	0	0	0	99	0	0	0	0	0	412	0	447
VIM	YAP1	9606.ENSP00000446007	9606.ENSP00000478927	0	0	0	0	0	0	0	0	0	0	0	208	0	208
RAN	YAP1	9606.ENSP00000446215	9606.ENSP00000478927	0	0	0	0	0	0	50	45	0	0	0	144	50	163
LIN7A	YAP1	9606.ENSP00000447488	9606.ENSP00000478927	0	0	0	0	0	0	0	0	68	0	0	138	159	265
NACA	YAP1	9606.ENSP00000448035	9606.ENSP00000478927	0	0	0	0	0	0	0	0	158	0	0	0	86	197
DNM1L	YAP1	9606.ENSP00000449089	9606.ENSP00000478927	0	0	0	0	0	0	64	0	167	0	0	0	58	201
KRT8	YAP1	9606.ENSP00000449404	9606.ENSP00000478927	0	0	0	0	0	138	0	0	0	0	0	165	50	256
UBE2J1	YAP1	9606.ENSP00000451261	9606.ENSP00000478927	0	0	0	0	0	0	60	0	188	0	0	0	57	217
MOAP1	YAP1	9606.ENSP00000451594	9606.ENSP00000478927	0	0	0	0	0	0	0	0	0	0	0	500	0	499
AKT1	YAP1	9606.ENSP00000451828	9606.ENSP00000478927	0	0	0	0	0	0	62	379	96	0	0	891	137	941
ISCA2	YAP1	9606.ENSP00000452007	9606.ENSP00000478927	0	0	0	0	0	0	0	0	0	0	0	170	0	169
C9orf69	YAP1	9606.ENSP00000453019	9606.ENSP00000478927	0	0	0	0	0	0	0	0	152	0	0	0	0	151
MEIS2	YAP1	9606.ENSP00000453793	9606.ENSP00000478927	0	0	0	0	0	65	0	0	185	0	0	0	400	502
STRA6	YAP1	9606.ENSP00000456609	9606.ENSP00000478927	0	0	0	0	0	0	0	0	0	0	0	167	85	205
USP10	YAP1	9606.ENSP00000457411	9606.ENSP00000478927	0	0	0	0	0	0	63	0	132	0	0	0	173	268
UBL7	YAP1	9606.ENSP00000457703	9606.ENSP00000478927	0	0	0	0	0	45	57	0	191	0	0	0	58	221
RSL1D1	YAP1	9606.ENSP00000460871	9606.ENSP00000478927	0	0	0	0	0	0	0	0	0	0	0	73	158	186
YES1	YAP1	9606.ENSP00000462468	9606.ENSP00000478927	0	0	0	0	0	152	0	336	163	900	0	681	95	983
TXNIP	YAP1	9606.ENSP00000462521	9606.ENSP00000478927	0	0	0	0	0	0	62	0	314	0	0	0	118	382
PABPC4L	YAP1	9606.ENSP00000463233	9606.ENSP00000478927	0	0	0	0	0	115	0	0	80	0	0	0	0	150
PTPRM	YAP1	9606.ENSP00000463325	9606.ENSP00000478927	0	0	0	0	0	76	0	0	81	0	0	74	86	185
UBBP4	YAP1	9606.ENSP00000464265	9606.ENSP00000478927	0	0	0	0	0	0	57	0	300	0	0	0	125	371
WTIP	YAP1	9606.ENSP00000466953	9606.ENSP00000478927	0	0	0	0	0	0	61	0	190	0	0	319	317	598
RAD23A	YAP1	9606.ENSP00000467024	9606.ENSP00000478927	0	0	0	0	0	0	57	0	191	0	0	0	55	216
WBP2	YAP1	9606.ENSP00000467579	9606.ENSP00000478927	0	0	0	0	0	0	63	379	264	0	0	548	353	851
PAK4	YAP1	9606.ENSP00000469413	9606.ENSP00000478927	0	0	0	0	0	0	53	0	51	0	0	141	173	276
SHANK2	YAP1	9606.ENSP00000469689	9606.ENSP00000478927	0	0	0	0	0	63	51	0	132	0	0	69	125	256
TAZ	YAP1	9606.ENSP00000469981	9606.ENSP00000478927	0	0	0	0	0	0	0	328	0	0	0	296	173	574
FBN3	YAP1	9606.ENSP00000470498	9606.ENSP00000478927	0	0	0	0	0	62	0	0	79	0	0	43	105	161
SLC25A16	YAP1	9606.ENSP00000476815	9606.ENSP00000478927	0	0	0	0	0	0	0	0	0	0	0	213	0	213
PPM1K	YAP1	9606.ENSP00000477341	9606.ENSP00000478927	0	0	0	0	0	0	62	0	133	0	0	0	0	151
BIRC2	YAP1	9606.ENSP00000477613	9606.ENSP00000478927	0	0	0	0	0	0	0	0	71	0	0	420	66	452
NR1H3	YAP1	9606.ENSP00000477707	9606.ENSP00000478927	0	0	0	0	0	0	0	0	185	0	0	0	86	223
PTPDC1	YAP1	9606.ENSP00000477817	9606.ENSP00000478927	0	0	0	0	0	0	61	0	183	0	0	0	0	200
ABCB1	YAP1	9606.ENSP00000478255	9606.ENSP00000478927	0	0	0	0	0	0	0	0	0	0	0	164	61	181
RYK	YAP1	9606.ENSP00000478721	9606.ENSP00000478927	0	0	0	0	0	77	0	0	76	0	0	66	90	178
YAP1	PCGF2	9606.ENSP00000478927	9606.ENSP00000482063	0	0	0	0	0	139	0	0	0	0	0	70	55	177
YAP1	UBXN8	9606.ENSP00000478927	9606.ENSP00000479216	0	0	0	0	0	0	62	0	158	0	0	0	57	190
YAP1	E2F8	9606.ENSP00000478927	9606.ENSP00000481103	0	0	0	0	0	0	50	0	0	0	0	162	58	184
YAP1	VPS29	9606.ENSP00000478927	9606.ENSP00000480853	0	0	0	0	0	0	50	0	176	0	0	0	0	183
YAP1	MAL2	9606.ENSP00000478927	9606.ENSP00000479708	0	0	0	0	0	142	0	0	0	0	0	56	0	155
YAP1	CTDP1	9606.ENSP00000478927	9606.ENSP00000484525	0	0	0	0	0	0	62	0	185	0	0	0	58	216
YAP1	IKBKG	9606.ENSP00000478927	9606.ENSP00000483825	0	0	0	0	0	0	0	0	0	0	0	244	0	243
YAP1	DCAF7	9606.ENSP00000478927	9606.ENSP00000483236	0	0	0	0	0	0	0	0	0	0	0	63	162	181
YAP1	SYNRG	9606.ENSP00000478927	9606.ENSP00000483453	0	0	0	0	0	0	63	0	126	0	0	0	74	175
YAP1	CD24	9606.ENSP00000478927	9606.ENSP00000483985	0	0	0	0	0	62	0	0	0	0	0	128	57	161
YAP1	MARK1	9606.ENSP00000478927	9606.ENSP00000483424	0	0	0	0	0	79	0	0	133	0	0	116	50	239
YAP1	TESK1	9606.ENSP00000478927	9606.ENSP00000481045	0	0	0	0	0	0	0	0	96	0	0	93	227	310
YAP1	TWIST2	9606.ENSP00000478927	9606.ENSP00000482581	0	0	0	0	0	136	0	0	0	0	0	73	0	164
YAP1	POLR2A	9606.ENSP00000478927	9606.ENSP00000480158	0	0	0	0	0	0	81	379	124	0	0	211	104	582
